## Multiple cell interactions are required for fate specification during male spicule development in *Caenorhabditis elegans*

Helen M. Chamberlin and Paul W. Sternberg

Howard Hughes Medical Institute and Division of Biology, California Institute of Technology, Pasadena, CA 91125, USA

### SUMMARY

The B blast cell divides postembryonically in *C. elegans* males to produce 47 progeny that include all of the cells of the copulatory spicules. During the early development of the B lineage, the anterior daughter of B, B.a, generates eight cells. These cells migrate to form four pairs of cells that flank the developing cloaca (ventral, dorsal, and two identical lateral pairs). For each pair, the more anterior cell produces a distinct lineage ('anterior fate') from the posterior cell ('posterior fate'). For the ventral and dorsal pairs, either cell can migrate to the anterior position and produce the anterior lineage, and the other cell migrates posterior and produces the posterior lineage (Sulston and Horvitz, 1977, *Dev. Biol.* 56, 110-156). The migration is variable, although the resultant fate pattern is invariant. In the two lateral pairs, both the migration and fate pattern are invariant. Using a laser microbeam to selectively ablate neighboring cells we

have found that the cells of the lateral pair also respond to positional cues. For all four pairs other male-specific blast cells provide extracellular cues. In general, F and U promote anterior fates, Y promotes some posterior fates, and the B.a progeny promote posterior fates. Several of these cues are redundant. By ablating combinations of cells we have deduced how these signals may act in concert to specify the fates of the B.a progeny. We propose that fate specification in these pairs depends on three general classes of extracellular cues: positional cues, modulators of positional cues, and lateral signals. The B lineage thus provides an opportunity to study with single cell resolution the integration of multiple intercellular signals.

Key words: *C. elegans*, cell lineage, cell interactions, cell fate specification, redundancy, pattern formation

### INTRODUCTION

The fate of a cell can be specified by information provided by the cell's precursors and by signals from the cell's neighbors. The experimental study of cell lineage (patterns of cell division and their relationship to cell fate) can provide clues about these mechanisms of fate specification and their interrelationship. The ability to visualize cell nuclei and their divisions in *C. elegans*, combined with the reproducibility of the lineage among animals, has allowed the complete description of the normal cell division pattern and the differentiated terminal fates (Sulston and Horvitz, 1977; Sulston et al., 1980, 1983). The cell lineage in *C. elegans* is essentially invariant. However, because the extracellular environment for most developing cells is as constant as the ancestry, the correlation of cell division and fate does not indicate that fate specification is completely autonomous. Indeed, cell interactions likely play an important role in cell fate specification. For example, the lineage includes several instances of cells that have the potential to adopt more than one fate (Sulston and Horvitz, 1977; Kimble and Hirsh, 1979; Sulston et al., 1983). In addition, embryonic blast cell rearrangement (Priess and Thomson, 1987; Wood, 1991) and isolation experiments (Schierenberg, 1987; Goldstein, 1992), as well as embryonic (Bowerman et al., 1992) and

postembryonic cell ablation experiments (Sulston and White, 1980; Kimble, 1981; Chisholm and Hodgkin, 1989) have identified instances of cell interactions that specify cell fate. The invariant cell lineage, rather than indicating a limited repertoire of fate specification mechanisms, offers a reproducible background to study the interplay of autonomous and conditional mechanisms.

To study the components of fate specification, we have focused our attention on the postembryonic lineage of the male B cell. The B cell is one of four male-specific blast cells (B, U, F and Y) that divide in males, but not in hermaphrodites, and produce some of the cells of the specialized mating structures of the male tail. The male B cell, for instance, produces all of the cells of the copulatory spicules (Fig. 1). The B lineage (Fig. 2) includes examples of autonomous as well as conditional fate specification. For example, the B cell undergoes asymmetric cytokinesis in its first division, which has been studied as a possible example of autonomous fate specification (Sternberg and Horvitz, 1988). Later in the lineage, two pairs of B progeny cells exhibit natural variation (Sulston and Horvitz, 1977). In each pair, one cell adopts the anterior position and fate, and the other cell the posterior position and fate. Although which cell adopts the anterior position varies from one animal to the next, the resultant pattern of anterior and

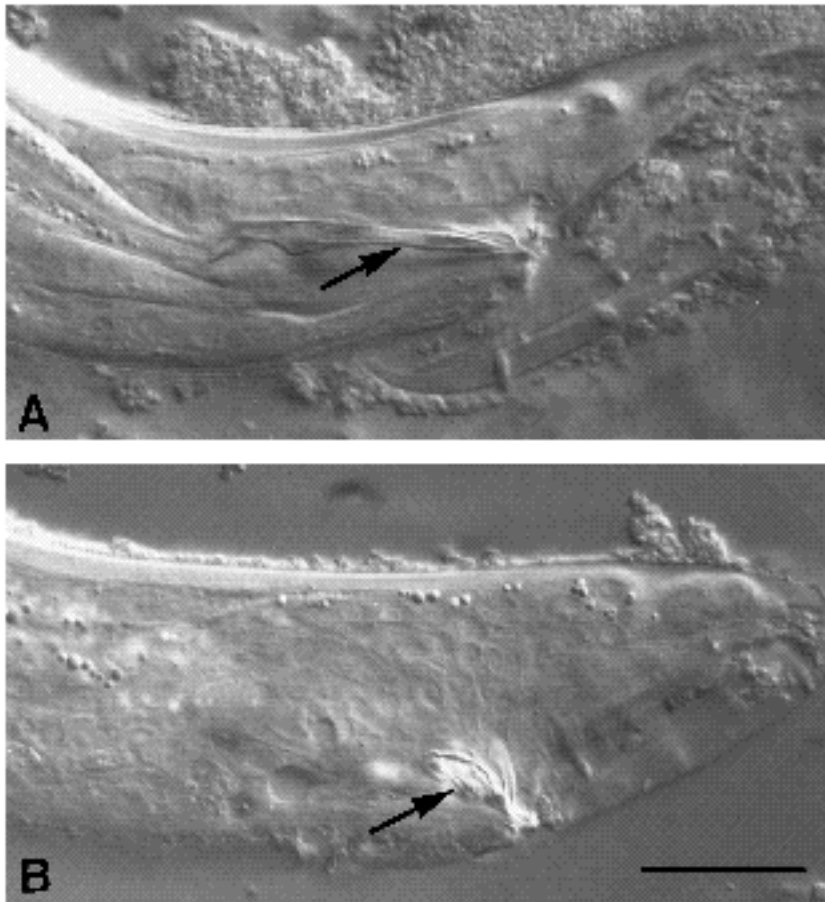

**Fig. 1.** Comparison of the adult male spicule in intact (A) and  $F^{-}U^{-}$  (B) animals. Arrows point to the left spicule. Nomarski photomicrographs, left lateral view (anterior left, ventral down). (A) In intact animals the spicules are long and straight. (B) In  $F^{-}U^{-}$  animals the spicules are short and crumpled due to disruption of the cell lineage that produces the spicule cells. Scale bar, 20  $\mu$ m.

posterior fates is always the same. Since the fate reflects the cell's position rather than its ancestry, this represents an example where extracellular cues likely play a role in fate specification.

In this study we use cell ablation to identify cells that provide specific extracellular cues. Ablation experiments also allow us to characterize the interaction of these cues, and to deduce their roles in fate specification. We focus on four pairs of B progeny cells that represent three distinct pair types. We have identified multiple extracellular cues that specify fate choice in each pair. These fall into three general classes (see Fig. 17): positional cues (such as inducers and inhibitors), modulators of positional cues (active or passive), and lateral signals. We present evidence that multiple extracellular cues may act in parallel, as well as in series, to specify cell fate(s). Having established extracellular components of fate and the developmental potentials of these cells, we also consider the interplay of autonomous and extracellular cues in producing the fates of the B cell lineage.

## MATERIALS AND METHODS

### Strains

Methods for culturing and handling *C. elegans* have been described by Brenner (1974) and Sulston and Hodgkin (1988). The strain **CB1490** *him-5(e1490)* provides a convenient source of

normal males, and we established it as the 'wild type' background for all ablations. The mutation *him-5(e1490)* increases loss and nondisjunction of the X chromosome, with little effect on the five autosomes (Hodgkin et al., 1979). Consequently, *him-5* mutant hermaphrodites (XX) segregate about 40% male (XO) self progeny.

### Cell nomenclature

Nomenclature follows the standard of Sulston and Horvitz (1977). The proper names for the B.a progeny at the 10 cell stage (Fig. 3E and Legend) are B.a(l/r)aa, B.a(l/r)ap, B.a(l/r)pa, and B.a(l/r)pp. Collectively, we refer to the cells as B.a(l/r)xx, where x refers to both daughter cells. We use (l/r) to indicate both the left and the right members of a pair. When we refer to a single set in the text we have removed the common prefix and shortened the names to **aa**, **ap**, **pa**, and **pp**. The intention is to increase readability, hopefully without the confusion often associated with the renaming of cells. We consider this simply a shorthand way of referring to the cells, and use the full, proper name in any instance that the shortened name might prove ambiguous. In general, **aa**, etc., refers to two cells - both the left and the right - except where explicitly noted.

### Cell lineage and laser ablation

Cell nuclei divisions were directly observed in live animals under Nomarski optics as described by Sulston and Horvitz (1977). Except where noted, the lineage of all B progeny cells was followed in each animal to completion. We have used the cell lineage - the axes, timing, and number of cell divisions - as an assay of cell fate. Therefore, although most animals were observed from the first divisions of the B.a(l/r)xx cells (early-mid L3 larval stage)

**A Intact, early**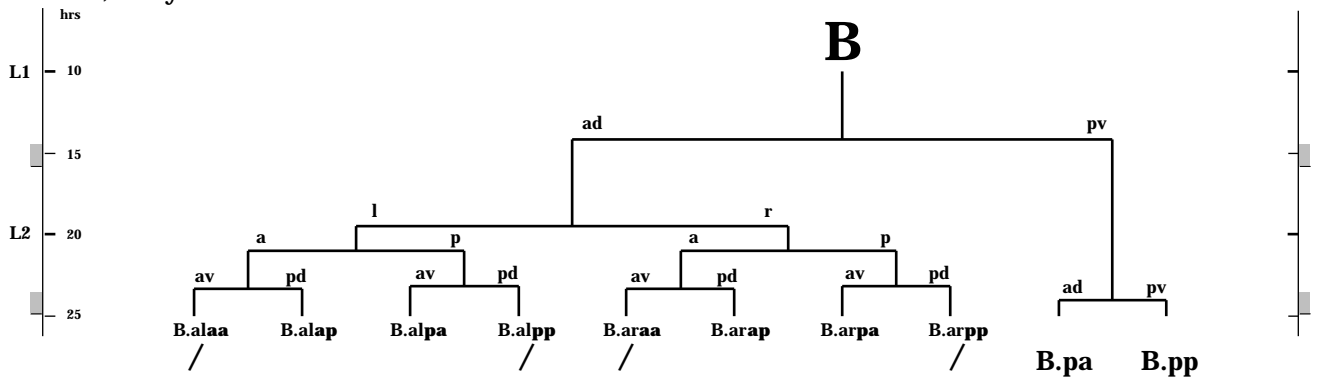**B Intact, late**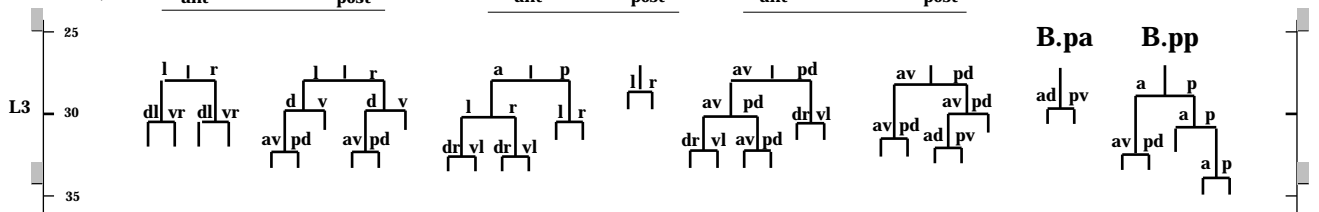**C F<sup>-</sup>U<sup>-</sup>, late**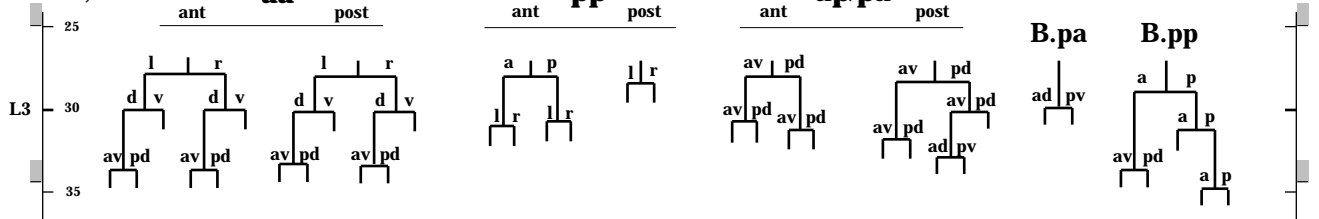

**Fig. 2.** B lineage in intact and ablated animals. Division axes are shown: anterior (a), posterior (p), left (l), right (r), dorsal (d), ventral (v). (A) Early divisions in the intact male. Lineage chart constructed from lineage and observation of anatomy of intact *him-5(e1490)* males. (B) Late divisions in the intact male. Lineage chart constructed from unperturbed lineages observed in B.p<sup>-</sup>, F<sup>-</sup>, or U<sup>-</sup> animals. (C) Late divisions in F<sup>-</sup>U<sup>-</sup> animal. Lineage chart constructed from F<sup>-</sup>U<sup>-</sup> animal 128 (see Table 1B.1). Note that lineages of presumptive , , and cells (anterior cells; ant) are disrupted. Early B divisions are normal in ablated animals. Division axes and time scale are standardized to Sulston et al. (1980). Cell deaths and terminal fates are not shown. The terminal fates are indicated in Table 8. The , , and lineage patterns are all distinct. and lineages both produce 6 progeny in a 2+4 pattern (2 progeny from one daughter, 4 from the other), but they differ in division axes. lineages produce 6 progeny in a 3+3 pattern.

through L3 molt, cells generally were not followed to the time when programmed cell deaths are observed in intact animals. Since the fates of B.p progeny were not disrupted by any ablation, we have used the timing of B.p divisions to correlate abnormal to normal lineages. Outside of the B progeny, the divisions of P11.p, P10.p and P9.p provide additional non-disrupted time-points. Although complete lineages were not obtained for these cells, we generally followed at least two division cycles in these cells.

Laser killing of cells was performed by the method of Sulston and White (1980), using the laser microbeam system and procedure of Avery and Horvitz (1987) and Sternberg (1988), except that the laserbeam was passed through a circular variable attenuator (gift of Newport Corporation), and animals were anesthetized on pads of 5% agar in water, containing 5  $\mu$ M (rather than 10  $\mu$ M) sodium azide. In general, F, U, and Y.p were ablated at the stage when B had divided to produce two cells (late L1 or early L2 stage). B.a progeny were ablated during mid to late L2 stage, generally soon after the targeted cells were generated. Many ani-

mals required ablation of cells at different stages of development. In these cases the animals underwent two to three rounds of anesthetic, surgery, recovery, and development. In all cases, animals that appeared unhealthy following treatment were discarded. The ablation of the targeted cells was confirmed the following day when the animals were prepared for lineage analysis.

For technical reasons, surgeries were performed on one day, and lineages followed the next. At 20°C only 5-10 hours separate the time of surgery and the re-initiation of B.a(l/r)xx cell division. Consequently, after a recovery and development period (1-6 hours, depending on the nature of the surgery) animals were shifted from 20°C to 10°C overnight to slow further development. Such shifts could disrupt temperature-sensitive aspects of the cell interactions or other developmental processes. However, (1) all of the experimental animals were treated the same, so our experiments are internally consistent, (2) normal lineages are observed in many ablation backgrounds (e.g., B.p<sup>-</sup>, see Table 1C.2), and (3) many ablations specifically disrupt a subset of fates, with the remaining fates essentially normal. Because normal lineages are possible, and

abnormal lineages are specific to certain ablation backgrounds, we believe the temperature shift does not fundamentally affect our results. All lineages were observed at 20°C.

## RESULTS

### Summary of spicule development

The spicules are a pair of structures that flank the male cloaca (Fig. 1). Electron microscope reconstruction by Sulston et al. (1980) indicate that the two spicules are sensilla covered with a hard, sclerotic cuticle. Each spicule includes two presumptive sensory neurons. Each neuron has a process that runs down the length of the spicule to the tip, where it is open to the environment. The neuronal processes are surrounded by socket and sheath cells, which provide structure and support. Each spicule is anchored by extensor and retractor muscles. During copulation the male inserts his spicules into the hermaphrodite vulva, where they anchor the male cloaca at the vulval opening and possibly aid in sperm transfer.

The B cell divides to produce all of the cells of the spicules. The B cell lineage consists of three distinct stages: early divisions, migration, and late divisions (Figs 2, 3 and 4; original observations of Sulston and Horvitz, 1977; Sulston et al., 1980). The early divisions take place primarily in the second larval stage (L2), and result in 10 progeny. A short range migration of the eight B.a progeny occurs in the late L2 stage. The late round of divisions begin in the mid-L3 stage, ultimately producing 47 progeny. The first division of B is asymmetric and along an approximately anterior/posterior axis (Figs 3A, 4A). The larger anterior cell (B.a) is the precursor of all cells of the spicules. B.a divides along a left/right axis, establishing the bilateral symmetry of the spicules. This symmetry is broken (during migration) and then re-established (during the late divisions) in the progeny of these cells. B.a.l and B.a.r each divide twice to produce a ring of eight cells, one cell thick (Fig. 3D). These cells then migrate. The medial migration of the two dorsal (pp) and ventral (aa) cells exhibits natural variation. In both cases, either the right or the left cell can adopt the more anterior position, while the other cell adopts the more posterior position. The cell that adopts the anterior position will produce a different lineage than the cell that adopts the posterior position (compare anterior and lineages to posterior and lineages in Fig. 2). The other four B.a progeny migrate invariantly. The **ap** cells adopt the anterior position (one on the left, one on the right), and the **pa** cells adopt the posterior position. The end result is a ring of cells, two cells thick (Figs 3E, 4B). It is convenient to refer to animals with the B progeny in this configuration as the '10 cell stage,' since in addition to the eight progeny of B.a, B.p has divided once.

The **aa** and **pp** pairs represent equivalence groups (Sulston and Horvitz, 1977; Sulston et al., 1980). In general, cells in an equivalence group have equivalent potential, but they adopt different fates after interacting with each other, after receiving positional cues, or both. Because of the variability from animal to animal, one must distinguish between lineal ancestry and fate choice when referring to cells in an equivalence group. Within the **aa** pair, the fate of the ante-

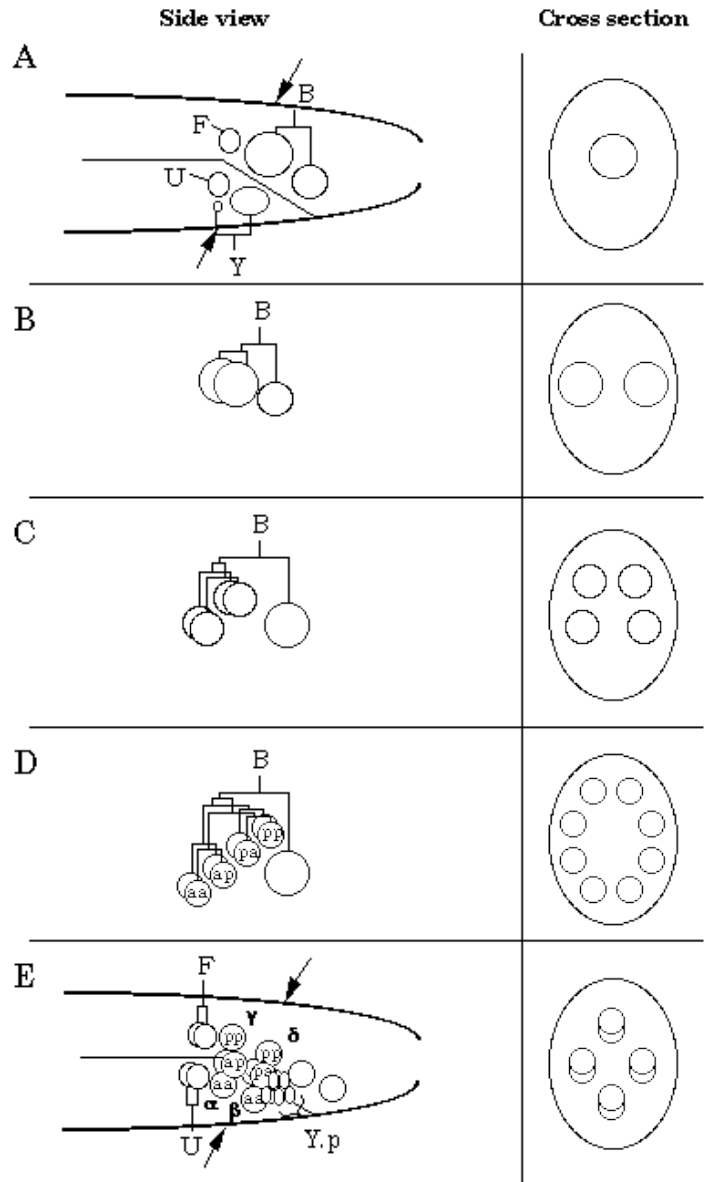

**Fig. 3.** The early divisions of B. Left lateral view and cross section of B.a at one (A), two (B), four (C), eight (D) cell stage, and after migration (E). Arrows indicate approximate plane of cross section. B.a divides along a left-right axis to initially establish the bilateral symmetry of the spicules (B). B.a produces eight progeny that form a ring of cells, a single cell thick (D). These cells migrate to form a ring of cells, two cells thick (E). It is convenient to refer to animals with the B progeny in this configuration as the '10 cell stage' since in addition to the eight progeny of B.a, B.p has divided once. F, U, and Y.p also divide during the early B divisions. F and U lie anterior to B, dorsal and ventral to the rectum, respectively (A). These cells divide once during the early B lineage, so that when the B.a(l/r)xx cells have migrated to their anterior/posterior positions, F.l and F.r lie next to presumptive , and U.l and U.r lie next to presumptive (E). These cells further divide during the late B divisions (Sulston et al., 1980). Y divides asymmetrically prior to the first division of B, producing a neuron and the Y.p blast cell (A). During the early B lineage, Y.p divides once to establish left/right symmetry. Further divisions result in a cluster of five cells on each side. The position of these clusters is more dorsal and lateral than the original position of Y (E).

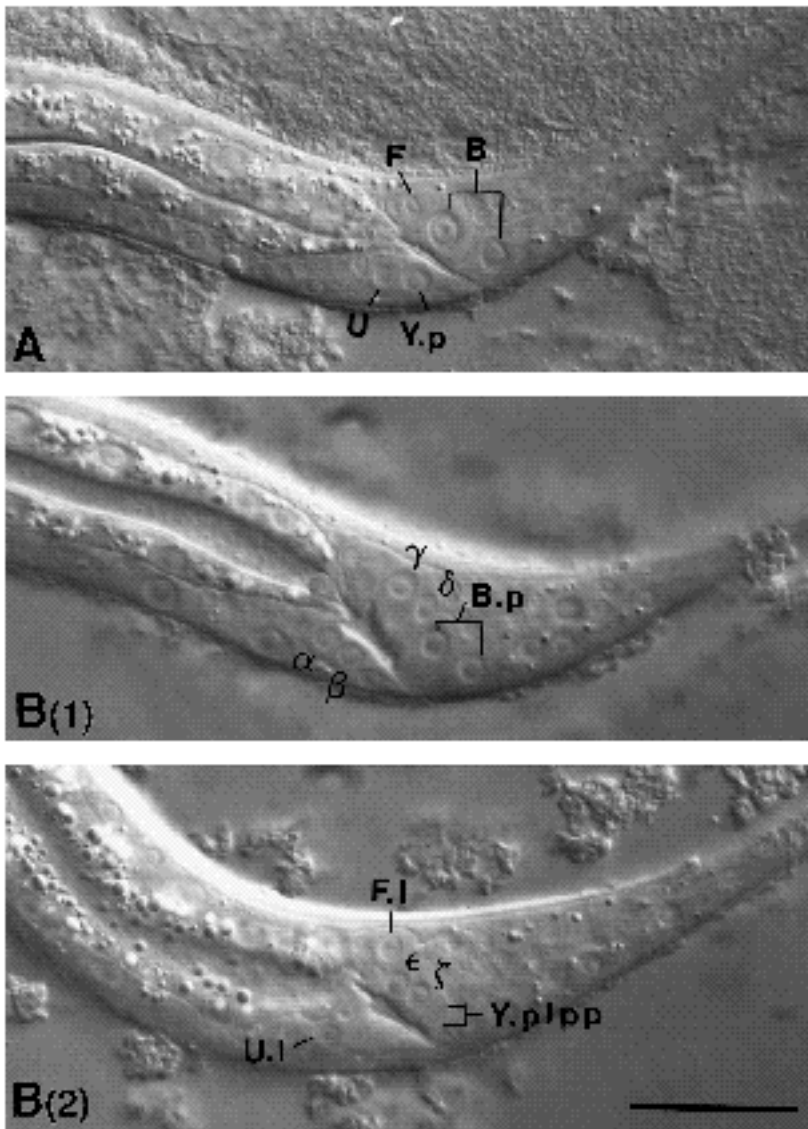

**Fig. 4.** Nomarski photomicrographs of early divisions of the B cell. (A) Arrangement of male-specific blast cells in the early L2 stage male. B and Y have each divided once (compare with Fig. 3A). (B1,2) Arrangement of B progeny at the 10 cell stage in early L3 male, medial (B.1) and left lateral (B.2) view of same animal. F and U have each divided once. Division of Y.p(l/r)pp is the final cell division in the Y lineage. The remaining Y.pl progeny are slightly ventral, anterior, and lateral to the dividing Y.plpp cell (compare with Fig. 3E). Scale bar, 20  $\mu$ m.

rior cell is termed  $\alpha$ , and the posterior cell,  $\beta$ . Likewise, the anterior cell in the **pp** pair is  $\epsilon$ , and the posterior cell,  $\zeta$  (Sulston and Horvitz, 1977). Sulston and White (1980) showed that after ablation of either the left or right **aa** cell, the remaining **aa** cell will migrate to the midline and produce an  $\alpha$  lineage. This establishes the  $\alpha$  fate as primary ( $1^\circ$ ) and the  $\beta$  fate as secondary ( $2^\circ$ ). Even if the targeted cell is migrating to the anterior position when it is ablated, the remaining cell will produce an  $\alpha$  lineage, indicating either that position promotes the  $\alpha$  fate, or that the fate of the **aa** cell is still flexible after migration is initiated. Similar experiments with the **pp** cells could not establish  $1^\circ$  or  $2^\circ$  fate in the  $\epsilon/\zeta$  pair.

We will show (Section II.B) that the **ap** and **pa** cells also respond to positional cues. In intact animals the fates of these cells are invariant. Our experiments indicate that there are distinct anterior and posterior fates, normally associated with the **ap** and **pa** cells, respectively. To distinguish between lineal ancestry and fate choice for these cells, we have assigned the Greek letter  $\gamma$  to the lineage normally

associated with the **ap** cells (the 'anterior' fate), and the letter  $\delta$  to the lineage normally associated with the **pa** cells (the 'posterior' fate).

For the B.a(l/r)xx cells, lineal heritage, cell position, and fate (subsequent lineage) are distinct characteristics. There are thus three distinct groups of B.a progeny. The **aa** cells represent one group, the ventral pair. Likewise, the **pp** cells comprise the dorsal pair. There are two lateral pairs (one left, one right), each comprising one **ap** and one **pa** cell. We consider the two laterally symmetrical pairs to be identical. We refer to the ventral, lateral, and dorsal groups as the **aa**, **ap/pa**, and **pp** pairs, respectively. Within each group there is a distinct anterior and a distinct posterior position. For instance, in intact animals the **ap** cells always adopt the anterior position in each lateral group. Finally, there are six distinct fates ( $\alpha, \beta, \gamma, \delta, \epsilon, \zeta$ ).  $\alpha$  indicates the lineage normally associated with the anterior cell in the dorsal group. Experimentally, however, this lineage is not restricted to the anterior position, although it *is* restricted to the dorsal group. Since these names represent observed

lineages as well as conceptual fates, we use the term *lineage* when referring to an observed result (literally, a -like lineage), and *fate* when discussing interpretations. We use the term 'presumptive' to refer to the cell in the anterior position of the dorsal group, regardless of the lineage.

### Interpretation of cell lineage data

The fate of precursor cells includes the cell lineage (number, timing and axes of divisions) and the terminal differentiated fates of the progeny produced by those divisions. Although both criteria are important to understanding the fate of a precursor cell, we have focused on the first. In the B lineage, the precise differentiated fates of the progeny are difficult to assess because (1) many of the precursors produce a similar set of differentiated cell types, (2) nuclear morphology (often used to identify neurons) is difficult to establish unambiguously due to the dense packing of cells in the tail, and (3) we currently lack suitable molecular markers that distinguish among the fates. In other analyses of postembryonic development in *C. elegans*, cell lineage has proved to be an accurate indicator of fate choice (e.g., Horvitz et al., 1983; Kenyon, 1986; Sternberg and Horvitz, 1986). In addition, we have observed transformation of terminal differentiation (cell death) in two animals where **pa**

produced lineages (data not shown). In this example, the transformation of cell lineage correlates with the transformation of differentiated cell fate. Thus, we believe that the number, timing, and axes of cell divisions generally reflect fate choice for a postembryonic blast cell. We cannot rule out the hypothesis that the terminal fates are distinct from the cell lineage, or that fate transformations are from B progeny to another cell type. However, we have limited our discussion to transformations within B cell fates. For simplicity, we initially hypothesize that the choice of versus , versus , and versus fates is specified in the B.a(l/r)xx cells. We discuss the validity of these assumptions at the end of each sub-section of Section III.

We often observe full transformation from one fate to another following cell ablation. However, we also observe a variety of abnormal lineages, and we have named the common ones (Fig. 5). A rigorous interpretation of the fate represented by abnormal lineages is sometimes difficult. In these cases we use the number of progeny as an indicator of fate as it is the most objective of cell lineage criteria. In the **pp** pair, for instance, we refer to the production of more progeny as reflecting an anterior-like ( ) state, and the production of fewer progeny a posterior-like ( ) state. We rely on the criterion of progeny number only in cases where the

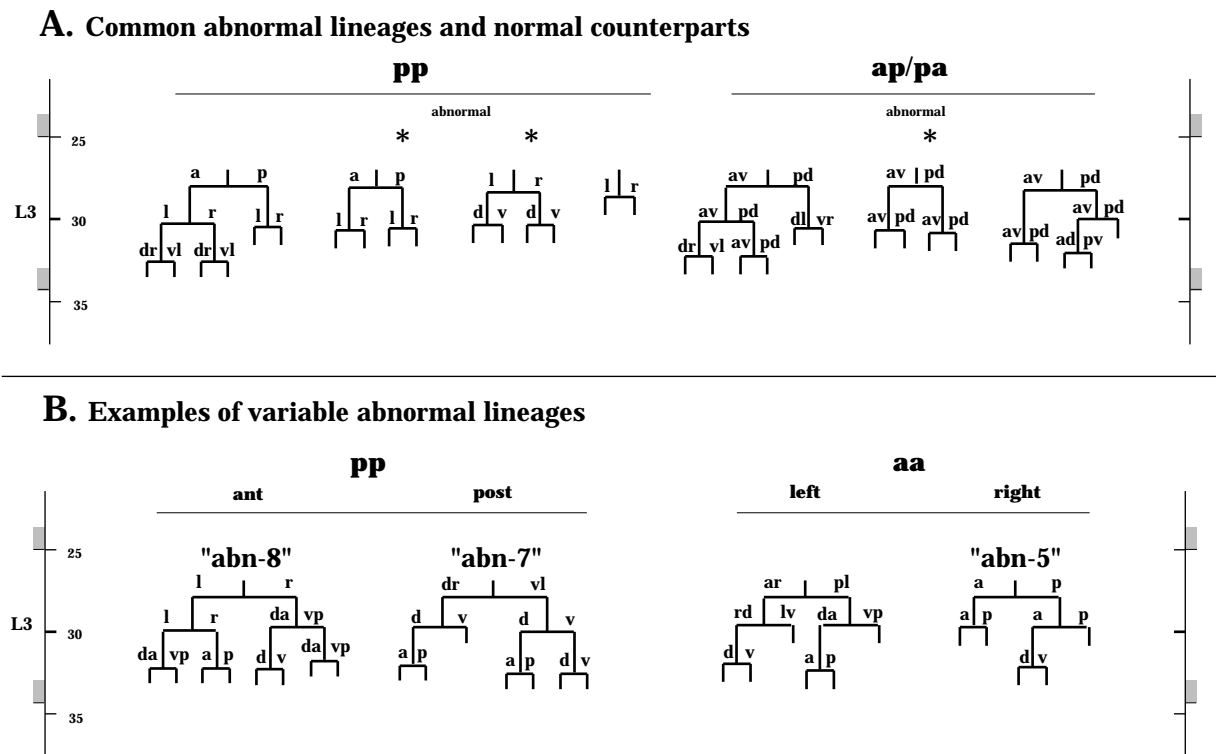

**Fig. 5.** Abnormal lineages observed in experimental animals. (A) Common abnormal lineages. Three abnormal lineages have been observed frequently and thus have been named (\*, \*, \*). \* and \* are both intermediate between and , but differ in the division axes. , , , and lineages are from Fig. 2. Timing of divisions in abnormal lineages can be variable. The lineage charts for \*, \*, \* were constructed from abnormal lineages observed in three or more affected animals. (B) Examples of other abnormal lineages. **pp** lineages from **aa** **ap** **pa** animal 275 (Table 1E.1). These lineages are representative of 'abnormal proliferative' lineages. The axes of division vary from animal to animal. **aa** lineages from F-U-Y.p<sup>-</sup> animal 203 (Table 1G). In this animal, the two **aa** cells remained left/right. The left **aa** cell illustrates . Although the axes are different, the division pattern is the same as a normal lineage (3+3; compare with Fig. 2). We consider lineages to be similar to normal lineages. The right **aa** cell is an example of an abn-5 lineage. Regardless of division axes, any cell that produces 5 progeny in a 2+3 pattern is considered abn-5.

observed lineages do not clearly suggest a fate. Consideration of the data in these terms has allowed the extraction of general interpretations from ablations that result in a mixture of abnormal lineages.

Table 1 includes the results from the 150 B lineages that we have followed in this study. Much of the data from this Table are also summarized in simpler Figures and Tables. We have divided the Results into four sections. First, we characterize interactions of the other male-specific blast cells (F, U, Y) on the fate of B.a progeny. This identifies anterior (from F/U) and posterior (from Y) positional cues that promote anterior and posterior fates. Second, we characterize the extracellular cues that the other B.a progeny provide for each of the three cell pairs. In general, the other B.a progeny act to promote posterior fate within each pair, providing a distinct posterior positional cue. Third, we investigate the relationship among the identified cues. These experiments allow us to establish modulatory and antagonistic relationships among the cues. We also investigate lateral interactions between cells in each pair, the 'ground state' within each pair, and the possible units of fate specification for each pair. Fourth, we consider what may distinguish the cells in one pair from the cells in another.

#### I. The male-specific blast cells (F, U, and Y) provide positional cues for the three B.a progeny groups

We examined the effect of the other male-specific blast cells on the B progeny because they are close neighbors. The results of these ablations are summarized in Fig. 6. In intact animals, F and U lie anterior to B, such that F is dorsal and U is ventral to the rectum (see Figs 3, 4). Y lies ventral to B, but the progeny of Y.p are situated more dorsal and pos-

terior than the precursor. Thus, F, U, Y.p and their progeny are positioned anterior or posterior, and immediately next to the B cell and its progeny.

#### A. F and U promote anterior fates

Ablation of F and U disrupts the lineages of presumptive  $\delta$ ,  $\epsilon$ , and  $\tau$ , but not  $\alpha$ ,  $\beta$ , and  $\gamma$  (summarized in Fig. 6B; data summary in Table 2; photographs in Fig. 7; data of Table 1B). Presumptive  $\delta$  cells (i.e., the positionally anterior **aa** cell) produce extra divisions, in many cases with the timing, axes, and number of divisions similar to those seen in a normal lineage. Specifically, presumptive  $\delta$  lineages were abnormal in all seven animals examined, and in 3/7 animals the presumptive  $\delta$  cells produced a complete  $\delta$ -like lineage. Presumptive  $\epsilon$  cells, which normally produce six progeny, produce truncated lineages. 3/7 produced four progeny, and 2/7 produced only two. Although the timing and axis of the single division of these cells was slightly irregular, we provisionally interpret these as  $\epsilon$  to transformations. Finally, 3/7 animals (5/14 sides) had truncated lineages ( $\epsilon$ \*, and one abn-5). In these animals the **ap** cells produced four rather than the usual six progeny.

The strong disruption of anterior fates is only apparent if both F and U are ablated (Table 1B.2,3). Ablation of only F or U results in essentially normal lineages. One abnormal lineage was observed in four F<sup>-</sup> animals, and one abnormal lineage was observed in four U<sup>-</sup> animals. In these cases, the fate is disrupted in the anterior cell that is normally closest to the progeny of the ablated cell. Thus, F and U are partially redundant in their ability to promote anterior fate. In addition, the lineage disruption is specific to the absence of F and U, and is not likely the non-specific result of cell damage or nearby debris.

Although F/U ablation disrupts anterior fates for all four pairs of cells, the results are variable, and the extent of the defect is not the same for the different pairs. Nevertheless, fates of the anterior cells but not fates of the posterior cells are disrupted in these animals. We conclude that F and U, or their progeny, are necessary to promote normal anterior fates in each of the four pairs of cells. In the absence of F and U, these cells produce abnormal lineages, and in some cases adopt the fate normally associated with their posterior neighbors.

#### B. Y.p promotes some posterior fates

Ablation of Y.p disrupts presumptive  $\delta$  lineages (summarized in Fig. 6C; data summary in Table 2; photographs in Fig. 8; data of Table 1C). Presumptive  $\delta$  cells divide an extra round, producing up to four progeny. Although the number of progeny increases, and thus might be considered a partial transformation of  $\delta$  to  $\epsilon$  fate, the first division retains the axis and approximate timing associated with the  $\delta$  lineage. Therefore, we conclude only that Y.p is required for proper  $\delta$  fate. The fate of the presumptive  $\delta$  cell was disrupted in 1/7 Y.p<sup>-</sup> animals examined, which may reflect a minor role for Y.p in the **aa** pair (see Section III.A.1). However, Y.p is not sufficient to specify  $\delta$  (see Section II.A). No abnormalities in the lineages of the anterior cells ( $\delta$ ,  $\epsilon$ , or  $\tau$ ) were observed (7 animals (6 for  $\delta$ )), nor was the  $\delta$  lineage disrupted (12 sides).

The progeny of B.p lie posterior to the four pairs of B.a

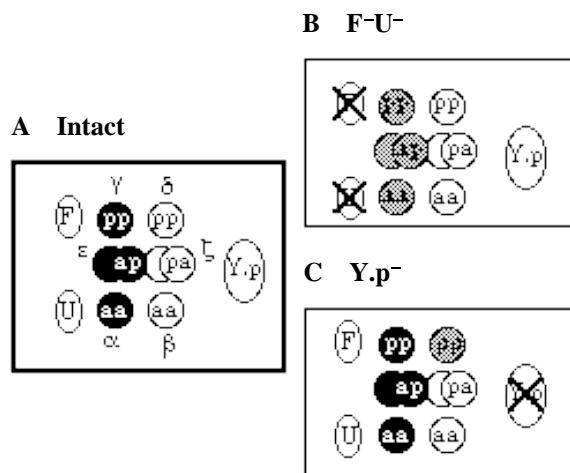

**Fig. 6.** Illustration of effects of F/U and Y.p ablation on the fates of the eight B.a progeny. F, U, Y.p are drawn to show the approximate position of F, U, and Y.p progeny when B is at the 10 cell stage. B.p progeny are not included in this Figure. Anterior is to the left, ventral down. (A) Intact. Black circles indicate anterior fates. White circles indicate posterior fates. (B) Ablation (indicated by X) of F and U disrupts anterior fates  $\delta$ ,  $\epsilon$ , and  $\tau$  (shaded circles). In some animals presumptive  $\delta$  (the anterior **pp** cell) is transformed to  $\epsilon$  and presumptive  $\epsilon$  is transformed to  $\delta$ . (C) Ablation of Y.p disrupts posterior fate,  $\delta$  (shaded circles). Data of Table 1B,C.

Table 1. Summary of lineages observed in experimental animals

|               |                                                                             | aa    |           | pp             |                | ap   |       | pa   |       | B.p(a/p)   |
|---------------|-----------------------------------------------------------------------------|-------|-----------|----------------|----------------|------|-------|------|-------|------------|
| animal no.    |                                                                             | Ant   | Post      | Ant            | Post           | Left | Right | Left | Right |            |
| <b>A.</b>     | <b>Intact</b>                                                               |       |           | [s]            | [t]            |      |       |      |       | normal (n) |
|               | no. of progeny                                                              | 4     | 6         | 6              | 2              | 6    | 6     | 5    | 5     |            |
| <b>B. (1)</b> | <b>F<sup>-</sup>U<sup>-</sup></b>                                           |       |           |                |                |      |       |      |       |            |
|               | 124                                                                         | abn-5 |           |                |                |      |       |      |       | n          |
|               | 125                                                                         | abn-5 |           |                |                |      |       |      |       | n          |
|               | 128                                                                         |       |           | *              |                | *    | *     |      |       | n          |
|               | 144                                                                         |       |           | *              |                |      | abn-5 |      |       | n          |
|               | 148                                                                         | abn-5 |           |                |                | *    | *     |      |       | n          |
|               | 151                                                                         |       |           | *              |                |      |       |      |       | n          |
|               | 216                                                                         | (l)   | abn-5 (r) |                |                |      |       |      |       | n          |
| <b>(2)</b>    | <b>F<sup>-</sup></b>                                                        |       |           |                |                |      |       |      |       |            |
|               | 142                                                                         |       |           | *              |                |      |       |      |       | n          |
|               | 145                                                                         |       |           |                |                |      |       |      |       | n          |
|               | 146                                                                         |       |           |                |                |      |       |      |       | n          |
|               | 152                                                                         |       |           |                |                |      |       |      |       | n          |
| <b>(3)</b>    | <b>U<sup>-</sup></b>                                                        |       |           |                |                |      |       |      |       |            |
|               | 140                                                                         | abn-5 |           |                |                |      |       |      |       | n          |
|               | 141                                                                         |       |           |                |                |      |       |      |       | n          |
|               | 143                                                                         |       |           |                |                |      |       |      |       | n          |
|               | 155                                                                         |       |           |                |                |      |       |      |       | n          |
| <b>C. (1)</b> | <b>Y.p<sup>-</sup></b>                                                      |       |           |                |                |      |       |      |       |            |
|               | 166                                                                         |       |           |                | *              | n.d. | n.d.  | n.d. | n.d.  | n          |
|               | 172                                                                         |       |           |                | *              |      |       |      |       | n          |
|               | 175                                                                         |       | abn-5     |                | abn-3 [s]      |      |       |      |       | n          |
|               | 177                                                                         |       |           |                | abn-3 [s]      |      |       |      |       | n          |
|               | 179                                                                         |       |           |                | abn-3 [o]      |      |       |      |       | n          |
|               | 224                                                                         |       |           |                |                |      |       |      |       | n          |
|               | 227                                                                         |       |           |                | *              |      |       |      |       | n          |
| <b>(2)</b>    | <b>B.p<sup>-</sup></b>                                                      |       |           |                |                |      |       |      |       |            |
|               | 479                                                                         |       |           |                |                |      |       |      |       | ---        |
|               | 480                                                                         |       |           |                |                |      |       |      |       | ---        |
|               | 481                                                                         |       |           |                |                |      |       |      |       | ---        |
| <b>(3)</b>    | <b>Y.p<sup>-</sup> B.p<sup>-</sup></b>                                      |       |           |                |                |      |       |      |       |            |
|               | 167                                                                         |       |           |                | abn-3 [s]      |      |       |      |       | ---        |
|               | 170                                                                         |       |           |                | *              |      |       |      |       | ---        |
|               | 171                                                                         | n.d.  | n.d.      |                | *              | n.d. | n.d.  | n.d. | n.d.  | ---        |
| <b>D. (1)</b> | <b>B.a(l/r)ap<sup>-</sup> B.a(l/r)pa<sup>-</sup> B.a(l/r)pp<sup>-</sup></b> |       |           |                |                |      |       |      |       |            |
|               | 243                                                                         |       |           | ---            | ---            | ---  | ---   | ---  | ---   | n          |
|               | 244                                                                         |       |           | ---            | ---            | ---  | ---   | ---  | ---   | n          |
|               | 245                                                                         |       |           | ---            | ---            | ---  | ---   | ---  | ---   | n          |
|               | 246                                                                         |       |           | ---            | ---            | ---  | ---   | ---  | ---   | n          |
|               | 445                                                                         |       | abn-5     | ---            | ---            | ---  | ---   | ---  | ---   | n          |
|               | 450                                                                         |       |           | ---            | ---            | ---  | ---   | ---  | ---   | n          |
| <b>(2)</b>    | <b>B.a(l/r)p<sup>-</sup></b>                                                |       |           |                |                |      |       |      |       |            |
|               | 241                                                                         |       |           | ---            | ---            |      |       | ---  | ---   | n          |
|               | 242                                                                         |       |           | ---            | ---            |      |       | ---  | ---   | n          |
| <b>(3)</b>    | <b>B.a(l/r)ap<sup>-</sup> B.a(l/r)pp<sup>-</sup></b>                        |       |           |                |                |      |       |      |       |            |
|               | 247                                                                         |       |           | ---            | ---            | ---  | ---   |      |       | n          |
|               | 279                                                                         |       |           | ---            | ---            | ---  | ---   | n.d. | n.d.  | n          |
|               | 280                                                                         |       | abn-5     | ---            | ---            | ---  | ---   | n.d. | n.d.  | n          |
| <b>E. (1)</b> | <b>B.a(l/r)aa<sup>-</sup> B.a(l/r)ap<sup>-</sup> B.a(l/r)pa<sup>-</sup></b> |       |           |                |                |      |       |      |       |            |
|               | 261                                                                         | ---   | ---       | abn-5 (l) [s]  | abn-7 (r) [s]  | ---  | ---   | ---  | ---   | n          |
|               | 262                                                                         | ---   | ---       | abn-8 (lv) [s] | abn-4 (rd) [s] | ---  | ---   | ---  | ---   | n          |
|               | 275                                                                         | ---   | ---       | abn-8 [t]      | abn-7 [o]      | ---  | ---   | ---  | ---   | n          |



Table 1. Continued

|        | animal no.                                                                                                              | aa        |           | pp        |           | ap    |       | pa    |       | B.p(a/p)       |
|--------|-------------------------------------------------------------------------------------------------------------------------|-----------|-----------|-----------|-----------|-------|-------|-------|-------|----------------|
|        |                                                                                                                         | Ant       | Post      | Ant       | Post      | Left  | Right | Left  | Right |                |
| (2)    | <b>B.a(l/r)ap<sup>-</sup> B.a(l/r)pa<sup>-</sup></b>                                                                    |           |           |           |           |       |       |       |       |                |
|        | 234                                                                                                                     |           |           | abn-7 [o] |           | ----  | ----  | ----  | ----  | n              |
|        | 235                                                                                                                     |           |           | abn-7 [s] | abn-7 [s] | ----  | ----  | ----  | ----  | n              |
|        | 388                                                                                                                     |           |           | abn-8 [s] | abn-3 [o] | ----  | ----  | ----  | ----  | n              |
|        | 402                                                                                                                     |           |           | abn-8 [s] |           | ----  | ----  | ----  | ----  | n              |
|        | 478                                                                                                                     |           |           | abn-6 [s] | *         | ----  | ----  | ----  | ----  | n              |
| (3)    | <b>B.a(l/r)a<sup>-</sup></b>                                                                                            |           |           |           |           |       |       |       |       |                |
|        | 238                                                                                                                     | ----      | ----      |           |           | ----  | ----  |       |       | n              |
|        | 239                                                                                                                     | ----      | ----      |           |           | ----  | ----  |       |       | n              |
|        | 240                                                                                                                     | ----      | ----      |           |           | ----  | ----  |       |       | n              |
|        | 389                                                                                                                     | ----      | ----      |           |           | ----  | ----  | abn-4 |       | n              |
|        | 454                                                                                                                     | ----      | ----      |           |           | ----  | ----  |       |       | n              |
| (4)    | <b>B.a(l/r)aa<sup>-</sup> B.a(l/r)pa<sup>-</sup></b>                                                                    |           |           |           |           |       |       |       |       |                |
|        | 256                                                                                                                     | ----      | ----      | * (r)     | (l)       |       |       | ----  | ----  | n              |
|        | 258                                                                                                                     | ----      | ----      | *         |           |       |       | ----  | ----  | n              |
|        | 259                                                                                                                     | ----      | ----      | *         |           |       |       | ----  | ----  | abn (.pp->.pa) |
|        | 260                                                                                                                     | ----      | ----      | *         |           | ( )   |       | ----  | ----  | n              |
| (5)    | <b>B.a(l/r)pa<sup>-</sup></b>                                                                                           |           |           |           |           |       |       |       |       |                |
|        | 282                                                                                                                     |           |           | (l)       | (r)       |       |       | ----  | ----  | n              |
|        | 283                                                                                                                     |           |           | *         |           |       |       | ----  | ----  | n              |
|        | 284                                                                                                                     |           |           |           |           |       |       | ----  | ----  | n              |
|        | 285                                                                                                                     |           |           | *         |           |       |       | ----  | ----  | n              |
|        | 390                                                                                                                     |           |           |           |           |       |       | ----  | ----  | n              |
| F. (1) | <b>B.a(l/r)a<sup>-</sup> B.a(l/r)pp<sup>-</sup></b>                                                                     |           |           |           |           |       |       |       |       |                |
|        | 251                                                                                                                     | ----      | ----      | ----      | ----      | ----  | ----  |       |       | n              |
|        | 252                                                                                                                     | ----      | ----      | ----      | ----      | ----  | ----  |       |       | n.d.           |
|        | 257                                                                                                                     | ----      | ----      | ----      | ----      | ----  | ----  |       |       | n              |
|        | 399                                                                                                                     | ----      | ----      | ----      | ----      | ----  | ----  |       |       | n              |
| (2)    | <b>B.a(l/r)p<sup>-</sup> B.a(l/r)aa<sup>-</sup></b>                                                                     |           |           |           |           |       |       |       |       |                |
|        | 422                                                                                                                     | ----      | ----      | ----      | ----      | *     |       | ----  | ----  | n              |
|        | 423                                                                                                                     | ----      | ----      | ----      | ----      |       |       | ----  | ----  | n              |
| G.     | <b>F<sup>-</sup> U<sup>-</sup> Y.p<sup>-</sup></b>                                                                      |           |           |           |           |       |       |       |       |                |
|        | 161                                                                                                                     | (l)       | (r)       |           | *         | *     | *     |       |       | n              |
|        | 181                                                                                                                     | abn-5 (l) | abn-7 (r) |           | *         |       |       |       |       | n              |
|        | 182                                                                                                                     | (l)       | (r)       | abn-5 [s] | abn-3 [o] | *     | *     |       |       | n              |
|        | 187                                                                                                                     |           |           |           |           | *     |       |       |       | n              |
|        | 203                                                                                                                     | (l)       | abn-5 (r) |           | abn-3 [t] | abn-5 | *     |       |       | n              |
| H. (1) | <b>F<sup>-</sup> U<sup>-</sup> B.a(l/r)ap<sup>-</sup> B.a(l/r)pa<sup>-</sup> B.a(l/r)pp<sup>-</sup></b>                 |           |           |           |           |       |       |       |       |                |
|        | 395                                                                                                                     | abn-5     |           | ----      | ----      | ----  | ----  | ----  | ----  | n.d.           |
|        | 397                                                                                                                     | (r)       | (l)       | ----      | ----      | ----  | ----  | ----  | ----  | n              |
|        | 400                                                                                                                     |           |           | ----      | ----      | ----  | ----  | ----  | ----  | n              |
|        | 415                                                                                                                     | abn-5 (l) | abn-5 (r) | ----      | ----      | ----  | ----  | ----  | ----  | n              |
|        | 449                                                                                                                     | (r)       | (l)       | ----      | ----      | ----  | ----  | ----  | ----  | n              |
|        | 453                                                                                                                     | (r)       | abn-7 (l) | ----      | ----      | ----  | ----  | ----  | ----  | n              |
| (2)    | <b>F<sup>-</sup> U<sup>-</sup> Y.p<sup>-</sup> B.a(l/r)ap<sup>-</sup> B.a(l/r)pa<sup>-</sup> B.a(l/r)pp<sup>-</sup></b> |           |           |           |           |       |       |       |       |                |
|        | 406                                                                                                                     | (r)       | (l)       | ----      | ----      | ----  | ----  | ----  | ----  | n              |
|        | 416                                                                                                                     |           |           | ----      | ----      | ----  | ----  | ----  | ----  | n              |
|        | 444                                                                                                                     | (l)       | abn-6 (r) | ----      | ----      | ----  | ----  | ----  | ----  | n              |
|        | 448                                                                                                                     | (l)       | (r)       | ----      | ----      | ----  | ----  | ----  | ----  | n              |
|        | 455                                                                                                                     | (l)       | abn-5 (r) | ----      | ----      | ----  | ----  | ----  | ----  | n              |
|        | 458                                                                                                                     | (l)       | abn-5 (r) | ----      | ----      | ----  | ----  | ----  | ----  | n              |

Table 1. Continued

|        | animal no.                                               | aa                                                                                                                      |           | pp            |               | ap    |       | pa   |       | B.p(a/p) |
|--------|----------------------------------------------------------|-------------------------------------------------------------------------------------------------------------------------|-----------|---------------|---------------|-------|-------|------|-------|----------|
|        |                                                          | Ant                                                                                                                     | Post      | Ant           | Post          | Left  | Right | left | right |          |
| I. (1) | <b>Y.p<sup>-</sup> B.a(l/r)pa<sup>-</sup></b>            |                                                                                                                         |           |               |               |       |       |      |       |          |
|        | 446                                                      |                                                                                                                         |           |               | *             |       |       | ---- | ----  | n        |
|        | 447                                                      |                                                                                                                         | abn-5     |               | *             |       |       | ---- | ----  | n        |
|        | 451                                                      |                                                                                                                         |           |               | abn-5 [t]     |       |       | ---- | ----  | n        |
|        | 452                                                      |                                                                                                                         |           |               | *             |       |       | ---- | ----  | n        |
|        | (2)                                                      | <b>F<sup>-</sup> U<sup>-</sup> B.a(l/r)pa<sup>-</sup></b>                                                               |           |               |               |       |       |      |       |          |
|        | 286                                                      | abn-6                                                                                                                   |           |               | *             |       | *     | ---- | ----  | n        |
|        | 391                                                      |                                                                                                                         | abn-5     |               |               |       |       | ---- | ----  | n        |
|        | 392                                                      |                                                                                                                         |           | abn-3 [s]     |               |       |       | ---- | ----  | n        |
|        | 393                                                      | abn-5                                                                                                                   |           | (l)           | (r)           | *     |       | ---- | ----  | n        |
|        | 394                                                      |                                                                                                                         |           | *             |               | abn-5 | *     | ---- | ----  | n        |
|        | 396                                                      | abn-5                                                                                                                   |           | *             | *             |       |       | ---- | ----  | n        |
|        | (3)                                                      | <b>F<sup>-</sup> U<sup>-</sup> B.a(l/r)ap<sup>-</sup> B.a(l/r)pa<sup>-</sup></b>                                        |           |               |               |       |       |      |       |          |
|        | 263                                                      | abn-5                                                                                                                   | abn-6     | *             |               | ----  | ----  | ---- | ----  | n        |
|        | 264                                                      |                                                                                                                         |           | *             |               | ----  | ----  | ---- | ----  | n        |
|        | 398                                                      | abn-5 (l)                                                                                                               | (r)       | (r) [s]       | * (l)         | ----  | ----  | ---- | ----  | n        |
|        | 412                                                      |                                                                                                                         |           |               |               | ----  | ----  | ---- | ----  | n        |
|        | (4)                                                      | <b>F<sup>-</sup> U<sup>-</sup> B.a(l/r)aa<sup>-</sup> B.a(l/r)ap<sup>-</sup> B.a(l/r)pa<sup>-</sup></b>                 |           |               |               |       |       |      |       |          |
|        | 417                                                      | ----                                                                                                                    | ----      |               | *             | ----  | ----  | ---- | ----  | n        |
|        | 420                                                      | ----                                                                                                                    | ----      | *             |               | ----  | ----  | ---- | ----  | n        |
|        | (5)                                                      | <b>F<sup>-</sup> U<sup>-</sup> Y.p<sup>-</sup> B.a(l/r)pa<sup>-</sup></b>                                               |           |               |               |       |       |      |       |          |
|        | 405                                                      | abn-5 (l)                                                                                                               | (r)       | (l) [t]       | * (r) [o]     | *     | *     | ---- | ----  | n        |
|        | 407                                                      | abn-6                                                                                                                   | abn-5     |               | *             |       | *     | ---- | ----  | n        |
|        | 456                                                      |                                                                                                                         |           |               | *             | abn-5 | *     | ---- | ----  | n        |
|        | (6)                                                      | <b>F<sup>-</sup> U<sup>-</sup> Y.p<sup>-</sup> B.a(l/r)ap<sup>-</sup> B.a(l/r)pa<sup>-</sup></b>                        |           |               |               |       |       |      |       |          |
|        | 413                                                      |                                                                                                                         |           | *             | abn-6 [s]     | ----  | ----  | ---- | ----  | n        |
|        | 414                                                      |                                                                                                                         |           |               | abn-5 [t]     | ----  | ----  | ---- | ----  | n        |
|        | 418                                                      | (l)                                                                                                                     | abn-5 (r) | abn-7 (r) [s] | abn-5 (l) [o] | ----  | ----  | ---- | ----  | n        |
|        | 421                                                      | (l)                                                                                                                     | (r)       | abn-7 [t]     | *             | ----  | ----  | ---- | ----  | n        |
|        | (7)                                                      | <b>F<sup>-</sup> U<sup>-</sup> Y.p<sup>-</sup> B.a(l/r)aa<sup>-</sup> B.a(l/r)ap<sup>-</sup> B.a(l/r)pa<sup>-</sup></b> |           |               |               |       |       |      |       |          |
|        | 419                                                      | ----                                                                                                                    | ----      | abn-6 [s]     | abn-6 [o]     | ----  | ----  | ---- | ----  | n        |
| J. (1) | <b>F<sup>-</sup> U<sup>-</sup> B.a(l/r)p<sup>-</sup></b> |                                                                                                                         |           |               |               |       |       |      |       |          |
|        | 253                                                      |                                                                                                                         | abn-7     | ----          | ----          |       | *     | ---- | ----  | n        |
|        | 254                                                      |                                                                                                                         |           | ----          | ----          | *     |       | ---- | ----  | n        |
|        | (2)                                                      | <b>F<sup>-</sup> U<sup>-</sup> Y.p<sup>-</sup> B.a(l/r)a<sup>-</sup></b>                                                |           |               |               |       |       |      |       |          |
|        | 404                                                      | ----                                                                                                                    | ----      | abn-6 (l) [o] | (r) [o]       | ----  | ----  |      |       | n        |
|        | 409                                                      | ----                                                                                                                    | ----      |               | *             | ----  | ----  |      |       | n        |
|        | 410                                                      | ----                                                                                                                    | ----      |               | *             | ----  | ----  |      |       | n        |
|        | 411                                                      | ----                                                                                                                    | ----      | (l)           | * (r)         | ----  | ----  |      |       | n        |
|        | 459                                                      | ----                                                                                                                    | ----      |               | abn-3 [s]     | ----  | ----  |      |       | n        |
|        | (3)                                                      | <b>F<sup>-</sup> U<sup>-</sup> Y.p<sup>-</sup> B.a(l/r)p<sup>-</sup></b>                                                |           |               |               |       |       |      |       |          |
|        | 461                                                      | n.d.                                                                                                                    | n.d.      | ----          | ----          |       |       | ---- | ----  | n        |
| K. (1) | <b>B.a(l or r)<sup>-</sup></b>                           |                                                                                                                         |           |               |               |       |       |      |       |          |
|        | 147 (l <sup>-</sup> )                                    |                                                                                                                         |           |               |               |       |       |      |       | n        |
|        | 157 (l <sup>-</sup> )                                    |                                                                                                                         |           |               |               | n.d.  |       | n.d. |       | n        |
|        | 164 (l <sup>-</sup> )                                    |                                                                                                                         |           |               |               |       |       |      |       | n        |
|        | 153 (r <sup>-</sup> )                                    |                                                                                                                         |           |               |               |       |       |      |       | n        |
|        | 156 (r <sup>-</sup> )                                    | abn-5                                                                                                                   |           |               |               |       |       |      |       | n        |

Table 1. Continued

|        | animal no.                                                                                                                  | <b>aa</b> |       | <b>pp</b> |           | <b>ap</b> |       | <b>pa</b> |       | B.p(a/p)      |
|--------|-----------------------------------------------------------------------------------------------------------------------------|-----------|-------|-----------|-----------|-----------|-------|-----------|-------|---------------|
|        |                                                                                                                             | Ant       | Post  | Ant       | Post      | Left      | Right | Left      | Right |               |
| (2)    | <b>F<sup>-</sup> U<sup>-</sup> B.a(l or r)<sup>-</sup></b>                                                                  |           |       |           |           |           |       |           |       |               |
|        | 168 (l <sup>-</sup> )                                                                                                       |           |       |           |           | *         |       | abn-4     |       | n             |
|        | 180 (l <sup>-</sup> )                                                                                                       |           |       | *         |           |           |       |           |       | n             |
|        | 159 (r <sup>-</sup> )                                                                                                       |           | abn-6 | *         |           | *         |       |           |       | n             |
|        | 160 (r <sup>-</sup> )                                                                                                       |           |       |           |           |           |       |           |       | n             |
|        | 162 (r <sup>-</sup> )                                                                                                       |           |       |           |           |           |       |           |       | n             |
|        | 165 (r <sup>-</sup> )                                                                                                       |           |       |           |           | abn-5     |       |           |       | n             |
|        | 169 (r <sup>-</sup> )                                                                                                       |           |       |           |           |           |       |           |       | n             |
| (3)    | <b>F<sup>-</sup> U<sup>-</sup> Y.p<sup>-</sup> B.a(l or r)<sup>-</sup></b>                                                  |           |       |           |           |           |       |           |       |               |
|        | 174 (l <sup>-</sup> )                                                                                                       |           |       | *         |           |           |       |           |       | n             |
|        | 213 (l <sup>-</sup> )                                                                                                       |           |       | abn-3 [s] |           |           |       |           |       | n             |
|        | 173 (r <sup>-</sup> )                                                                                                       |           |       | *         |           |           |       |           |       | n             |
|        | 176 (r <sup>-</sup> )                                                                                                       |           |       | *         |           |           |       |           |       | n             |
| L. (1) | <b>F<sup>-</sup> U<sup>-</sup> Y.p<sup>-</sup> B.a(l/r)p<sup>-</sup> B.a(l or r)a<sup>-</sup> B.a(l or r)ap<sup>-</sup></b> |           |       |           |           |           |       |           |       |               |
|        | 457 (l <sup>-</sup> )                                                                                                       |           |       | ----      | ----      | ----      | ----  | ----      | ----  | abn (damaged) |
|        | 460 (l <sup>-</sup> )                                                                                                       |           |       | ----      | ----      | ----      | ----  | ----      | ----  | n             |
|        | 463 (l <sup>-</sup> )                                                                                                       |           |       | ----      | ----      | ----      | ----  | ----      | ----  | n             |
|        | 464 (r <sup>-</sup> )                                                                                                       |           |       | ----      | ----      | ----      | ----  | ----      | ----  | n             |
|        | 465 (r <sup>-</sup> )                                                                                                       |           |       | ----      | ----      | ----      | ----  | ----      | ----  | n             |
| (2)    | <b>F<sup>-</sup> U<sup>-</sup> Y.p<sup>-</sup> B.a(l/r)a<sup>-</sup> B.a(l or r)p<sup>-</sup> B.a(l or r)pa<sup>-</sup></b> |           |       |           |           |           |       |           |       |               |
|        | 466 (l <sup>-</sup> )                                                                                                       | ----      | ----  |           | abn-5 [s] | ----      | ----  | ----      | ----  | n             |
|        | 467 (l <sup>-</sup> )                                                                                                       | ----      | ----  |           | [s]       | ----      | ----  | ----      | ----  | n             |
|        | 468 (l <sup>-</sup> )                                                                                                       | ----      | ----  |           | abn-6 [s] | ----      | ----  | ----      | ----  | n             |
|        | 469 (r <sup>-</sup> )                                                                                                       | ----      | ----  |           | [s]       | ----      | ----  | ----      | ----  | n             |
|        | 462 (r <sup>-</sup> )                                                                                                       | ----      | ----  |           | abn-8 [s] | ----      | ----  | ----      | ----  | abn (damaged) |
| (3)    | <b>F<sup>-</sup> U<sup>-</sup> Y.p<sup>-</sup> B.a(l/r)a<sup>-</sup> B.a(l/r)pp<sup>-</sup></b>                             |           |       |           |           |           |       |           |       |               |
|        | 470                                                                                                                         | ----      | ----  | ----      | ----      | ----      | ----  | ----      | ----  | n             |
|        | 471                                                                                                                         | ----      | ----  | ----      | ----      | ----      | ----  | ----      | ----  | n             |
|        | 472                                                                                                                         | ----      | ----  | ----      | ----      | ----      | ----  | ----      | ----  | n             |
|        | 473                                                                                                                         | ----      | ----  | ----      | ----      | ----      | ----  | ----      | ----  | n             |
| (4)    | <b>F<sup>-</sup> U<sup>-</sup> Y.p<sup>-</sup> B.a(l/r)p<sup>-</sup> B.a(l/r)aa<sup>-</sup></b>                             |           |       |           |           |           |       |           |       |               |
|        | 474                                                                                                                         | ----      | ----  | ----      | ----      |           |       | ----      | ----  | n             |
|        | 475                                                                                                                         | ----      | ----  | ----      | ----      |           | abn-7 | ----      | ----  | n             |
|        | 476                                                                                                                         | ----      | ----  | ----      | ----      |           | abn-8 | ----      | ----  | n             |
|        | 477                                                                                                                         | ----      | ----  | ----      | ----      |           |       | ----      | ----  | n             |

Each line represents the observed lineages for one animal. Each animal is identified by a unique number. A dash indicates that the cell was ablated in that animal. n indicates normal B.p lineage. n.d. indicates that the cell was present, but not followed to completion of the lineage. abn-*n* indicates that the lineage was abnormal, but produced *n* progeny. If the cells of a pair failed to migrate, the side is indicated in parentheses (e.g., left is (l), left ventral is (lv)). Canonical \*, \*, and \* lineages, and examples of some other abnormal lineages, are illustrated in Fig. 5. The number of progeny produced by each cell in the intact animal is listed in Section A for reference. For ablations in Sections K and L we have grouped bilaterally symmetrical experiments together, and indicate the actual cell ablated in parentheses after the number of the animal (e.g., in K.1 147(l<sup>-</sup>) is B.al<sup>-</sup>).

Cell lineages are characterized by the number, axes, and timing of divisions. Of these, number of divisions is the most objective criterion. Our analyses suggest that although first division axis may reflect cell state in the **pp** pair, it appears not to be predictive in the **aa** pair (it was never fundamentally disrupted in the **ap/pa** pairs). Thus, we have utilized the symbol (as in ), which indicates that the cell division pattern was topologically that lineage, although the division axes were skewed. For instance, if an **aa** cell fails to migrate, it will often divide along an anterior/posterior axis. However, if both anterior and posterior cells produce three progeny, the lineage is because of the 3+3 pattern of progeny, regardless of the division axis (illustrated in Fig. 5). Similarly, indicates a 4+2 pattern of progeny, but abnormal division axes. Note that all lineages within a class of lineages (e.g., abn-5) are topologically the same (2 progeny from one daughter, 3 from the other, or 2+3; see Fig. 5). Specifically, abn-3 are (1+2), abn-4 (2+2), abn-5 (2+3), abn-6 (3+3 in a **pp** lineage, 2+4 in an **aa** lineage), abn-7 (3+4), abn-8 (4+4). In general, abnormal lineages from cells that migrate properly retain the axes associated with the normal lineage (l-r, or transverse [t] for presumptive , , and , a-p or sagittal [s] for presumptive , av-pd for presumptive and ). If **aa** cells fail to migrate, the initial axis is generally a-p. If many B.a neighbors are absent, an **ap** or **pa** axis is often a-p. Although it is not fully predictive, the first axis of division differs in lineages compared with lineages, and it may reflect cell state in the **pp** pair. Because the cell lineage can be variable, this axis is indicated for the abnormal **pp** cell lineages in brackets. [s] sagittal, [t], transverse, [o], oblique. and \* lineages are [s], and \* lineages are [t]. Not every division of the left **ap** lineage was observed in G.4, animal 260.

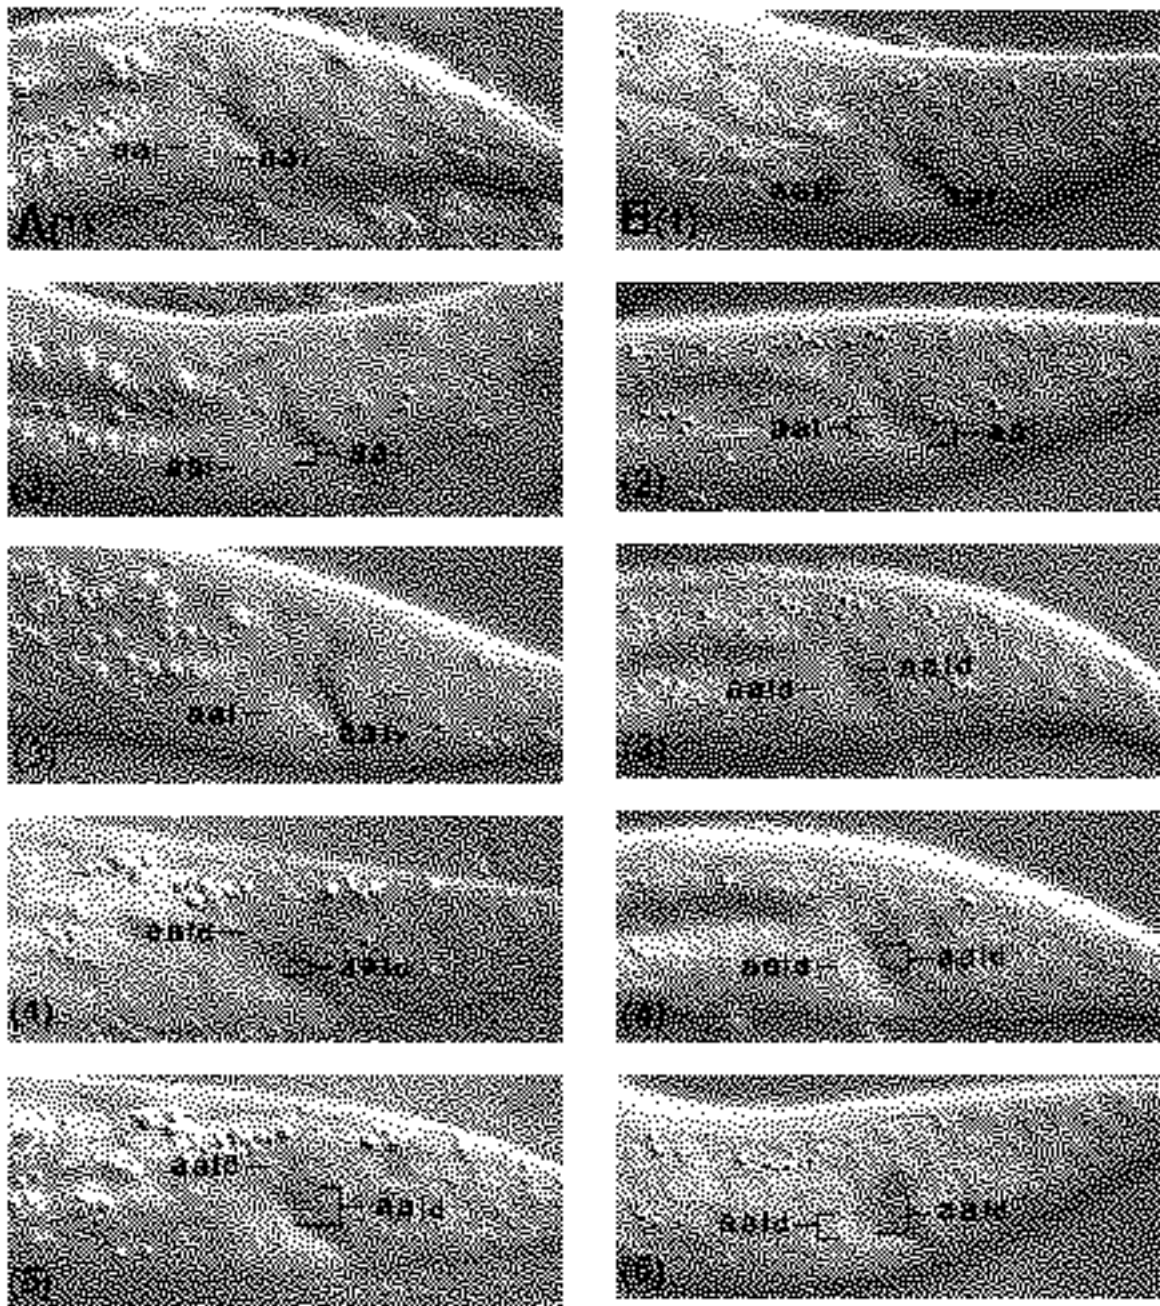

**Fig. 7.** The transformation of *ld* to *l/r* fate observed in  $F^{-}U^{-}$  animals. Nomarski photomicrographs, left lateral view. (A) Intact. (B)  $F^{-}U^{-}$ . (A.1-3) In intact animals, the daughters of presumptive *ld* divide prior to the daughters of presumptive *l/r* (average difference 40 minutes). (A.1) Both presumptive *ld* (anterior *aal*) and *ld* (posterior *aal*) are visible. (A.2) Presumptive *ld* divides (metaphase). (A.3) Nuclei of presumptive *ld* daughters reform. Presumptive *l/r* is visible in the same plane of focus as the yet undivided presumptive *ld*. (B.1-3) Disrupted fates in  $F^{-}U^{-}$  animals are apparent in the division of the *aa* cell daughters. (B.1) Nuclei of anterior and posterior *aal* cells (presumptive *ld* and *ld*, respectively) are apparent. (B.2) Both cells begin to divide. (B.3) Nuclei of daughters of both presumptive *ld* and *ld* reform. Presumptive *ld* and *ld* are indicated. (A.4,5) In intact animals, *l/r* divide. (A.4) Metaphase of presumptive *ld*. The nucleus presumptive *ld* is also labeled. (A.5) The daughter nuclei of presumptive *ld* reform. Presumptive *ld* remains intact. (B.4-6) Both presumptive *l/r* and *l/r* divide in transformed  $F^{-}U^{-}$  animals. (B.4) Presumptive *ld* metaphase. (B.5) Presumptive *ld* anaphase. Daughter nuclei of presumptive *ld* are reforming. (B.6) Daughter nuclei of both presumptive *ld* and *ld* are visible in this plane of focus. Scale bar, 20  $\mu$ m.

**Table 2. Summary of lineage disruptions that result from F/U and Y.p ablation**

|                               | <b>aa</b> |           | <b>pp</b> |           | <b>ap/pa</b> |           |
|-------------------------------|-----------|-----------|-----------|-----------|--------------|-----------|
|                               | Anterior  | Posterior | Anterior  | Posterior | Anterior     | Posterior |
| Intact                        | all† (4)‡ | all (6)   | all (6)   | all (2)   | all (6)      | all (5)   |
| F <sup>-</sup> U <sup>-</sup> | 0/7 (5.4) | 7/7 (6)   | 2/7 (4)   | 7/7 (2)   | 9/14 (5.4)   | 14/14 (5) |
| F <sup>-</sup>                | 4/4 (4)   | 4/4 (6)   | 3/4 (5.5) | 4/4 (2)   | 8/8 (6)      | 8/8 (5)   |
| U <sup>-</sup>                | 3/4 (4.2) | 4/4 (6)   | 4/4 (6)   | 4/4 (2)   | 8/8 (6)      | 8/8 (5)   |
| Y.p <sup>-</sup>              | 7/7 (4)   | 6/7 (5.9) | 7/7 (6)   | 1/7 (3.3) | 12/12 (6)    | 12/12 (5) |

Data from Table 1B,C. Ablation of F and U together disrupts anterior ( , , ) fates, but removal of only F or U generally results in normal lineages. Ablation of Y.p disrupts posterior ( and rarely ) fates. †Normal lineages/lineages followed; ‡average number of progeny in parentheses.

progeny, and thus might also promote posterior fates. However, ablation of B.p does not disrupt the fates of B.a progeny. In addition, ablation of B.p and Y.p does not appreciably enhance the effect of ablation of Y.p alone (Table 1C.2,3). We conclude that Y.p or its progeny is necessary to promote normal posterior fate in the **pp** pair.

### C. Summary of male-specific blast cell effects

We have demonstrated that the male-specific blast cells F, U, and Y (or their progeny) provide at least some of the positional cues that specify anterior versus posterior fates in the **aa**, **pp**, and **ap/pa** pairs. The disruptions and fate transformations resulting from ablation are variable, and

not complete. We cannot distinguish whether this is a result of the limitations of cell ablation techniques in general, whether it is a result of the methods we have used, whether it reflects an inherent variability of the system, or whether other cells provide additional positional cues. Nevertheless, we have found that distinct cell fates are disrupted, and in some cases complete transformation of fate is observed.

### II. Activity of B.a(l/r)xx cells on the cell pairs

At the 10 cell stage, many of the neighbors of the cells of each pair are other B.a progeny. We have investigated the interactions that occur among the B.a progeny. For sim-

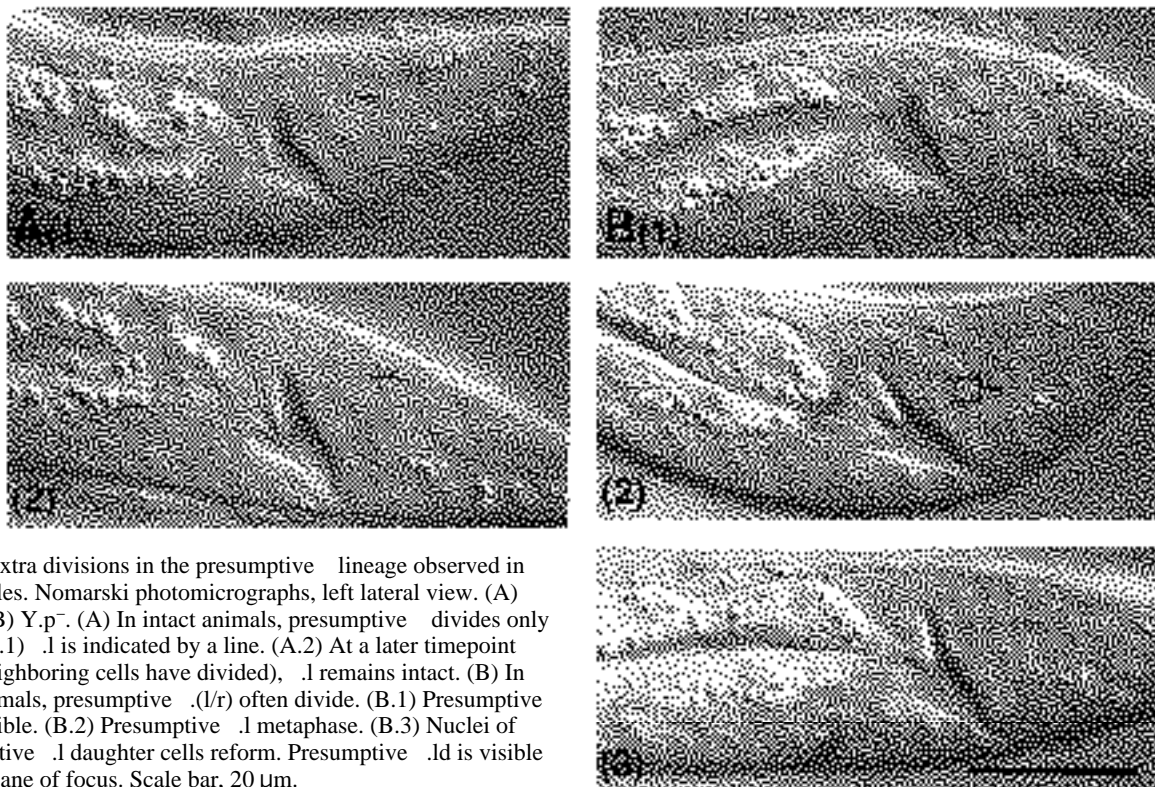

**Fig. 8.** Extra divisions in the presumptive .l lineage observed in Y.p<sup>-</sup> males. Nomarski photomicrographs, left lateral view. (A) Intact. (B) Y.p<sup>-</sup>. (A) In intact animals, presumptive .l divides only once. (A.1) .l is indicated by a line. (A.2) At a later timepoint (after neighboring cells have divided), .l remains intact. (B) In Y.p<sup>-</sup> animals, presumptive .l(l/r) often divide. (B.1) Presumptive .l is visible. (B.2) Presumptive .l metaphase. (B.3) Nuclei of presumptive .l daughter cells reform. Presumptive .ld is visible in this plane of focus. Scale bar, 20 μm.

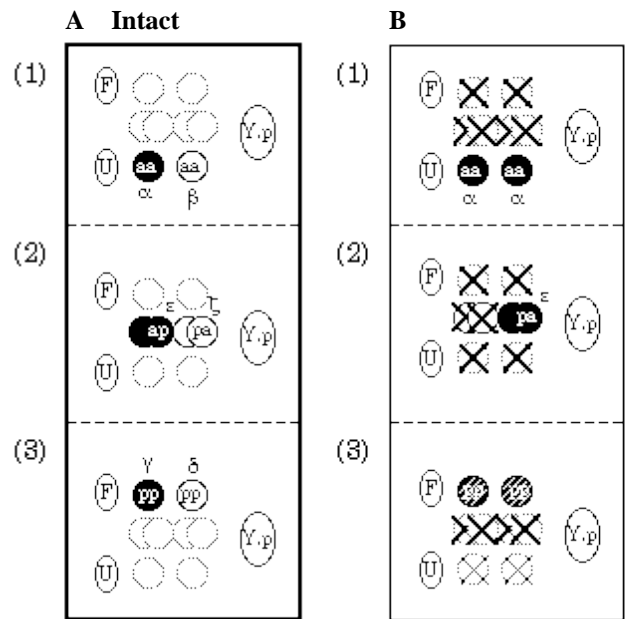

**Fig. 9.** Schematic comparison of the effects of removal of the other B.a progeny on each of the three cell pairs. In general, the posterior cell of the pair adopts a more anterior-like fate (anterior left, ventral down). (A) Intact. Black circles represent anterior fates, white circles represent posterior fates. (B) Experimental. (B.1) Posterior **aa** cells adopt (anterior) fate in **ap<sup>-</sup>pa<sup>-</sup>pp<sup>-</sup>** animals. (B.2) **pa** cells adopt (anterior) fate in **aa<sup>-</sup>ap<sup>-</sup>pp<sup>-</sup>** animals. (B.3) Both anterior and posterior **pp** cells produce abnormal proliferative lineages (indicated by shading; example in Fig. 5B) in **ap<sup>-</sup>pa<sup>-</sup>aa<sup>-</sup>** animals. The effect is also seen if only **ap** and **pa** are ablated. Data of Table 1D,E,F.

plicity, we present the data for each cell pair separately. These results are summarized in Fig. 9.

**A. Ventral group (**aa** cells)**

To characterize any influences on the **aa** pair from the other six B.a progeny, we first isolated the pair by ablation of **ap**, **pa**, and **pp** (Table 3; data of Table 1D,E,2). If anterior cues from F/U and possible posterior cues from Y.p are sufficient to promote normal and fates in the **aa** pair,

| Table 3. Summary of lineage disruptions in the <b>aa</b> cell pair that result from ablation of other B.a progeny |           |           |     |       |
|-------------------------------------------------------------------------------------------------------------------|-----------|-----------|-----|-------|
| Intact                                                                                                            | <b>aa</b> |           | all | (6)   |
|                                                                                                                   | Anterior  | Posterior |     |       |
|                                                                                                                   | all†      | (4)‡      |     |       |
| <b>ap<sup>-</sup>pa<sup>-</sup>pp<sup>-</sup></b>                                                                 | 6/6       | (4)       | 1/6 | (4.5) |
| <b>pa<sup>-</sup>pp<sup>-</sup></b>                                                                               | 2/2       | (4)       | 2/2 | (6)   |
| <b>ap<sup>-</sup>pp<sup>-</sup></b>                                                                               | 3/3       | (4)       | 2/3 | (5.7) |
| <b>ap<sup>-</sup>pa<sup>-</sup></b>                                                                               | 4/4       | (4)       | 4/4 | (6)   |

Data from Table 1D,E,2. Removal of **ap/pa/pp** cells results in the disruption of posterior ( ) fate. In general, presumptive cells adopt an fate. However, if any other pair of cells remain (**ap<sup>-</sup>pa<sup>-</sup>**, **ap<sup>-</sup>pp<sup>-</sup>**, or **pa<sup>-</sup>pp<sup>-</sup>** [B.a(l/r)a<sup>-</sup>]), the presumptive will be essentially normal. †normal lineages/lineages followed; ‡average number of progeny in parentheses.

**Table 4. Summary of lineage disruptions in the **ap/pa** pairs that result from ablation of other B.a progeny**

|                                                   | <b>ap</b> |       | <b>pa</b> |       |
|---------------------------------------------------|-----------|-------|-----------|-------|
|                                                   | Anterior  |       | Posterior |       |
| Intact                                            | all†      | (6)‡  | all       | (5)   |
| <b>aa<sup>-</sup>ap<sup>-</sup>pp<sup>-</sup></b> | ×         |       | 0/8       | (6)   |
| <b>aa<sup>-</sup>ap<sup>-</sup></b>               | ×         |       | 3/10      | (5.5) |
| <b>ap<sup>-</sup>pp<sup>-</sup></b>               | ×         |       | 1/2       | (5.5) |
| <b>aa<sup>-</sup>pa<sup>-</sup>pp<sup>-</sup></b> | 3/4       | (5.5) | ×         |       |
| <b>aa<sup>-</sup>pa<sup>-</sup></b>               | 8/8       | (6)   | ×         |       |
| <b>pa<sup>-</sup>pp<sup>-</sup></b>               | 4/4       | (6)   | ×         |       |

Data from Table 1D,E,F. Each animal has two **ap/pa** pairs, which are considered independently for this Table (i.e., 10 **aa<sup>-</sup>ap<sup>-</sup>** represents 5 animals). Removal of **aa/ap/pp** cells results in the disruption of **pa** fate. The **pa** cells generate lineages. If other pairs remain (**aa-ap** [B.a(l/r)a<sup>-</sup>], or **ap-pp**), the **pa** cells will sometimes generate a lineage, and sometimes an lineage. Removal of **aa/pa/pp** (or a subset thereof) generally does not disrupt the fate of **ap** cells. X indicates that the cell is absent. †normal lineages/lineages followed; ‡average number of progeny in parentheses.

then **aa** cells isolated from the other B.a progeny should produce normal lineages. However, we find that the other B.a progeny are necessary for proper specification of fate. Specifically, ablation of all of the other B.a progeny results in truncation of the lineage of the presumptive cell (5 of 6 animals). Since the axes and timing, as well as number of progeny of these cells resembles those associated with a normal lineage, we consider this to be a to transformation. Thus the B.a progeny promote posterior ( ) fate in the **aa** pair. The presence of any pair is sufficient to promote normal lineages. Ablation of **ap** and **pa**, or **ap** and **pp**, or **pa** and **pp** (B.a(l/r)p<sup>-</sup>) generally results in normal lineages from the presumptive and cells. Thus the cell pairs are redundant in their ability to promote fate.

**B. Lateral groups (**ap/pa** cells)**

The other B.a progeny act to promote posterior fate in the **pa** cells (Fig. 10; Table 4; data of Table 1D,3,E,3,F). Ablation of the other six B.a progeny causes **pa** cells to produce lineages. If one other pair of B.a progeny remain, the **pa** cells will sometimes produce an lineage, and other times a lineage (**aa<sup>-</sup>** and **ap<sup>-</sup>** [B.a(l/r)a<sup>-</sup>]; **ap<sup>-</sup>** and **pp<sup>-</sup>** lineages; **aa<sup>-</sup>pp<sup>-</sup>** by examination of anatomy only (data not shown)). We conclude that the other B.a progeny act to promote posterior fate in the **pa** cells. Consistent with this result, the fate of **ap** does not depend on the presence of other B.a progeny.

**C. Dorsal group (**pp** cells)**

Ablation of all other B.a progeny (**aa**, **ap**, and **pa**) results in abnormal lineages produced by both the presumptive and the presumptive cells (Table 5; data of Table 1E). These abnormal lineages are novel in that they can result in up to eight progeny, which is more than is produced by

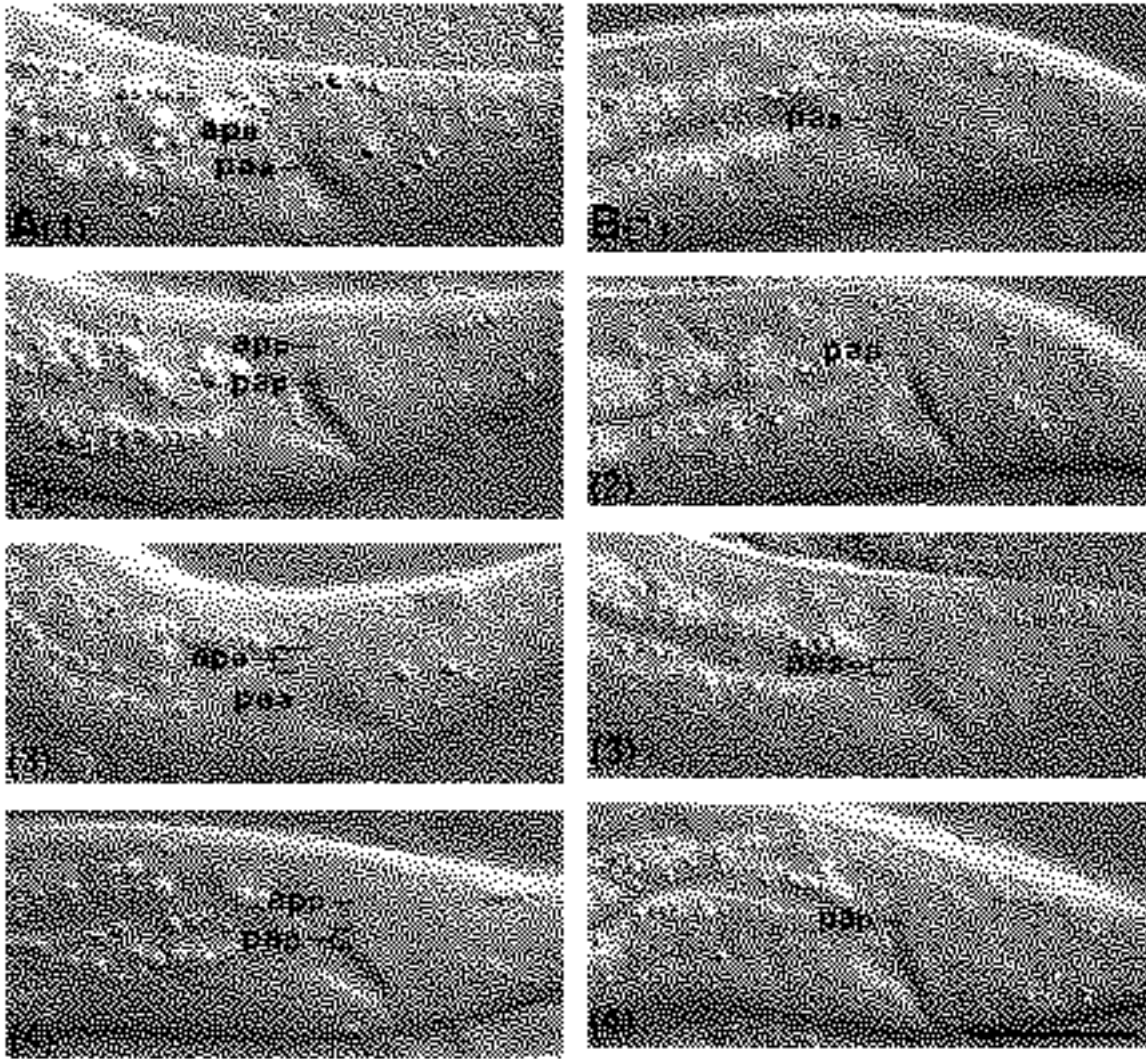

**Fig. 10.** The transformation of **pa** to fate in the absence of other B.a progeny. As with **aa** fates (Fig. 7), differences between and lineages are apparent in the timing of division of the progeny of **ap** and **pa**. The anteroventral daughter of divides prior to the posteriodorsal daughter. In intact animals (A), **ap** produce lineages, and **pa** produce lineages. In an lineage, the **apa** (A.1) cell is larger than **app** (A.2), and divides first (A.3,4). In a lineage, the **pap** (A.2) cell is larger than **paa** (A.1), and divides first (A.3,4). (B) In the absence of other B.a progeny, **pa** will adopt fate. This transformation sometimes occurs if a subset of other B.a progeny are absent, as shown in this B.a(l/r)a<sup>-</sup> (aa<sup>-</sup>ap<sup>-</sup>) animal (see Table 1E.3). In this animal, **paa** (B.1) is larger than **pap** (B.2), and divides first (B.3,4). Both daughters of **paa** divide, consistent with an lineage (not shown). Nomarski photomicrographs are of left lateral (A.1,3; B.1,3) and left medial (A.2,4; B.2,4) focal planes. Scale bar, 20  $\mu$ m.

either normal or lineages (example in Fig. 5). For simplicity they can be thought of as lineages with .p behaving like .a (see below). These abnormal lineages are also observed when only **ap** and **pa** are ablated. The results of experiments that ablate B.a progeny in different combinations indicate that either **ap** or **pa** is sufficient to prevent the abnormal proliferative lineages, and thus the pairs are redundant. We propose that the **ap** and **pa** cells play two roles in / fate specification. One role is to promote proper execution of the lineage. This function ensures that a specified has six progeny, in a 4+2 pattern (4 progeny from one daughter, 2 from the other, see Table 1 legend). The other role is to promote posterior ( ) fate. Thus in the absence of **ap/pa/(aa)**, presumptive adopts a more anterior-like fate. However, because of the second function of

the **ap/pa/(aa)** cells, neither presumptive nor presumptive properly executes the lineage. We present further evidence for this two step fate specification model in Section III.C.

Removal of **ap** and **aa** (by ablation of the precursors B.a(l/r)a) results in normal and lineages. In some of these animals the **pa** cells produce lineages (see above; Table 1E.3). Thus, the **pa** cells are sufficient to promote normal and lineages, and this function is independent of their own fate. Removal of **aa** and **pa** (or **pa** alone) results in truncation of presumptive lineages, similar to the lineages in an F<sup>-</sup>U<sup>-</sup> animal. Thus, the **pa** cells appear to play a role in two distinct processes. Together with the **ap** cells, the **pa** cells act to inhibit extra proliferation in both presumptive and . Alone, they function to increase



**Table 5. Summary of lineage disruptions in the pp cell pair that result from ablation of other B.a progeny**

|                                                 | PP       |       |           |       |
|-------------------------------------------------|----------|-------|-----------|-------|
|                                                 | Anterior |       | Posterior |       |
| Intact                                          | all†     | (6)‡  | all       | (2)   |
| aa <sup>-</sup> ap <sup>-</sup> pa <sup>-</sup> | 0/3      | (7)   | 0/3       | (6)   |
| ap <sup>-</sup> pa <sup>-</sup>                 | 0/5      | (7.2) | 2/5       | (3.6) |
| aa <sup>-</sup> ap <sup>-</sup>                 | 5/5      | (6)   | 5/5       | (2)   |
| aa <sup>-</sup> pa <sup>-</sup>                 | 0/4      | (4)   | 4/4       | (2)   |
| pa <sup>-</sup>                                 | 1/5      | (3.6) | 5/5       | (2)   |

Data from Table 1E. Removal of **aa/ap/pa** cells results in the disruption of anterior ( ) and posterior ( ) fate. Both cells generally undergo abnormal proliferative lineages, producing up to 8 progeny (example in Fig. 5B). A similar effect is seen if only **ap/pa** cells are ablated. Removal of **aa/ap** cells (*B.a(l/r)a<sup>-</sup>*) results in essentially normal lineages. However, removal of **pa** (alone or with **aa**) disrupts presumptive fate. In these animals, presumptive undergoes truncated lineages similar to those seen in *F-U<sup>-</sup>* animals. †normal lineages/lineages followed; ‡average number of progeny in parentheses.

proliferation of presumptive . Although they promote fate in both (or and fate), the effects are opposite on the extent of cell division (Table 5).

#### D. Summary of B.a progeny interactions

We conclude that the cells in each of the three types of *B.a(l/r)xx* cell pairs respond to cues provided by the other B.a progeny. For all pairs, the other B.a progeny act to promote the posterior fate. Specifically, **ap**, **pa**, and **pp** promote fate in the **aa** pair, and **aa**, **ap**, and **pp** promote fate in the **ap/pa** pairs. B.a progeny ablation results in abnormal lineages in both cells of the **pp** pair. However, as discussed above, one function of **aa**, **ap**, and **pa** might be to promote posterior ( ) fate in the **pp** pair.

For each pair the interaction is unique. Any other pair of B.a progeny is sufficient to promote posterior fate ( ) in **aa** cells, whereas a single pair is not always sufficient to promote posterior fate ( ) in **pa** cells. In the **pp** pair, only the **pa** cells are sufficient to promote both and fates. At least one set of **ap** or **pa** cells is required to promote posterior fate ( ). The **pa** cells have two distinct roles. Ablation of the **pa** cells alone reduces the progeny of presumptive , whereas ablation of both the **ap** and **pa** cells increases the progeny of presumptive , compared to normal. These roles of the **pa** cells are discussed in Section III.C.

#### III. Interactions among identified positional cues

The ablation experiments described so far indicate that each pair responds to several positional cues. For each pair, most of these have distinct effects. To understand how the cues might combine to specify fate in each group, we examined animals in which we ablated two or more ‘signals.’ Such ablations can indicate the regulatory relationship among the cues and the nature of signal integration in the responding cells. We refer to ablation of single components (e.g., F and

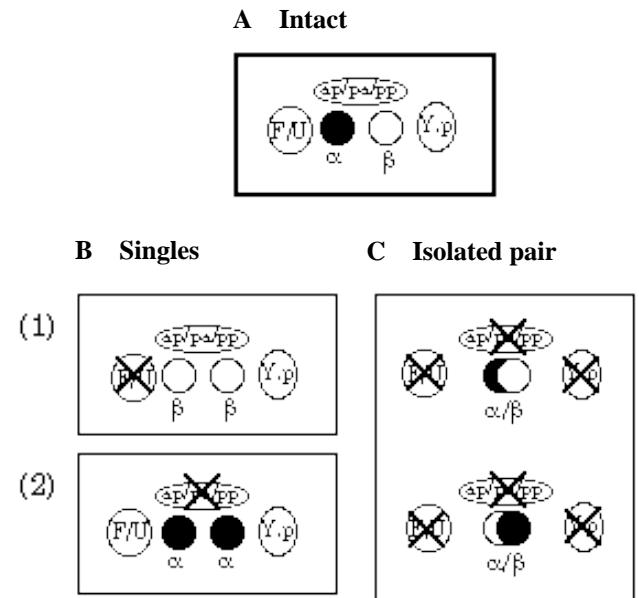

**Fig. 11.** Schematic summary of the effects of ablation of multiple positional cues on the **aa** cell pair. (B.1) Ablation of F and U results in both **aa** cells adopting the posterior ( ) fate (white circle). (B.2) Ablation of other B.a progeny results in both **aa** cells adopting the anterior ( ) fate (black circle). (C) In the absence of all identified positional cues, **aa** cells fail to migrate, but often produce one -like and one -like lineage. Anterior left, ventral down. Data of Table 1B.1; D.1 (B), and H.2 (C).

U) as a ‘single’ ablation, and ablation of two components (e.g., F and U, **ap** and **pa** and **pp**) as a ‘double’ ablation, even though multiple cells are removed.

#### A. Ventral group (**aa** cells)

Two major components of fate specification have been identified for the **aa** pair. F and U provide anterior positional cues because ablation of F/U disrupts presumptive fate and results in (partial) transformation of to . The other B.a progeny, **ap/pa/pp**, promote posterior fate. Ablation of these cells disrupts presumptive fate and results in transformation of to . In addition, Y.p may play a minor role in providing posterior cues. To understand the interplay of these cues, we have followed the cell lineages of animals in which two or all three of these components have been ablated (key experiments summarized in Fig. 11).

##### 1. F/U and Y.p

Analysis of ablations of F/U and Y.p is complicated by the fact that in most animals the **aa** cells remain left/right rather than migrate to anterior/posterior positions as they do in intact animals. Thus *positionally* there is no ‘presumptive’ or . Since neither F/U nor Y.p ablation alone results in such high frequency of failure to migrate, it suggests that both F/U and Y.p (in the presence of all B.a progeny) are sufficient to promote normal migration. Thus, although Y.p ablation alone has only a minor effect on fate specification (see Table 2), it appears to play a role in anterior/posterior patterning. Despite the abnormal positioning, one can follow the lineages of the cells, and interpret them in terms



of the lineages that those cells would normally produce. However, the division axes of the abnormally positioned cells are usually abnormal.

The **aa** cells in F<sup>-</sup>U<sup>-</sup>Y.p<sup>-</sup> animals can produce both - and -like lineages, although some abnormal lineages are also observed (2/5 animals abnormal, Table 1G). In each of the three animals without abnormal lineages, one of the two **aa** cells produced an -like lineage, and the other produced a -like lineage. Since lineages were observed in 3/5 F<sup>-</sup>U<sup>-</sup>Y.p<sup>-</sup> animals while no lineages were observed in 7 F<sup>-</sup>U<sup>-</sup> animals, the removal of Y.p may partially counteract the absence of F and U in specification of fate. Thus although single ablation of Y.p results in only a minor disruption of fate in the **aa** cells, ablation of Y.p together with F/U indicates that the **aa** cells can respond to Y.p cues.

## 2. F/U, and **ap/pa/pp**

Ablation of the two primary components of **aa** fate specification, F/U and **ap/pa/pp**, does not clearly resemble one or the other single ablation (Table 1H.1). As in the F<sup>-</sup>U<sup>-</sup>Y.p<sup>-</sup> double ablation, the **aa** cells tend to remain side by side, and some abnormal lineages are observed. In contrast to the single ablation of **ap/pa/pp**, we observe many -like lineages. Since the to transformations that occur upon **ap/pa/pp** ablation are dependent on the presence of F and U, one of the roles of the other B.a progeny may be to modulate (inhibit, regulate, or otherwise localize) the F/U activity. However, the B.a progeny must also have an active role of their own, antagonistic to F/U, since the double ablation does not simply resemble the single ablation of F/U.

## 3. F/U, Y.p, and **ap/pa/pp**

Removal of all three components (F/U, Y.p, **ap/pa/pp**) isolates the **aa** pair from all characterized components of fate specification (Table 1H.2). The majority of the cells remain left/right (and thus first division axes are a-p rather than l-r), but both -like and -like lineages are observed. In each animal, one cell produces four progeny suggesting it is -like, and the other cell produces six (or sometimes five) progeny, often in the 3+3 pattern associated with the fate. Thus patterning of the two cells is apparent, although the cells do not migrate properly and the extracellular cues that we have identified are absent. There might be other factors that interact with the **aa** cells to promote their fates. However, since the **aa** cells remain side by side, these factors are unlikely to be providing anterior-posterior positional cues. A more satisfactory explanation is that the two **aa** cells interact with each other. In the presence of the cues provided by the other cells this lateral interaction may act to reinforce the positional information, to ensure the result of one cell with each fate. However, in the absence of those cues the cells can interact to establish one cell adopting an -like fate, and one a -like fate.

## 4. Interaction between **aa** cells

### a. B.al<sup>-</sup> or B.ar<sup>-</sup> background

To further characterize the possible role of interaction between the two **aa** cells in promoting fate, we have carried out a series of experiments in which a single **aa** cell remains in different ablation backgrounds (Table 1K). We eliminated one of the **aa** cells by ablating either the pre-

cursor B.al or B.ar. These ablations also eliminate all of the other B.a progeny on one side. Although we have evidence that the other B.a progeny can play a role in / fate specification, in pairwise ablations their activity is redundant. In addition, all B.al<sup>-</sup> or B.ar<sup>-</sup> animals have the same ablation background, so comparison among these experiments can provide some information about the contribution of interaction between **aa** cells in the specification of fate.

Ablation of B.al or B.ar leaves one **aa** daughter, but the other positional cues (from F/U, Y.p. and potentially from the remaining B.a progeny) are intact. Four of five of the **aa** cells in this case produce an lineage (one abnormal). This result is consistent with the results of Sulston and White (1980), who found that if a single **aa** cell is ablated, the remaining cell will produce an lineage. We find that ablation of F and U in a B.al<sup>-</sup> or B.ar<sup>-</sup> animal results in the single **aa** cell producing a lineage. Therefore, it is F and U that promotes fate in the single **aa** cell. In the absence of F and U, the remaining B.a progeny and Y.p promote the fate. If both F/U and Y.p are ablated in a B.al<sup>-</sup> or B.ar<sup>-</sup> background, the remaining **aa** cell still usually adopts the posterior fate (Table 1K.3), although the presence of the remaining B.a progeny is apparently not always sufficient to promote fate. We have not distinguished whether this is because Y.p is absent, or because the full set of B.a progeny is not present. Nevertheless, in general, single **aa** cells can respond to positional cues.

### b. Isolated B.a(l or r)aa

We isolated single **aa** cells in five animals by removing F/U, Y.p, and all of the B.a progeny except for one of the **aa** cells (Table 1L.1). In four cases this cell underwent an -like lineage, and in one case it underwent a -like lineage. Thus in the absence of all identified cues, **aa** cells generally adopt fate. However, because of the variable results, we have not established as the 'ground state'. Another possibility is that the 'isolated' **aa** cell chooses between and fate stochastically.

## 5. Summary of experiments in the ventral group

Multiple cell interactions play a role in fate specification in the **aa** pair. F/U, **ap/pa/pp**, and Y.p contribute external cues to distinguish anterior and posterior fates, as well as to promote proper migration of the cells to an anterior/posterior orientation. This role in promotion of migration is apparent only if more than one component is removed, and is therefore redundant. The presence of any two of the three components is generally sufficient to promote normal migration, whereas the presence of any one is not. Double ablation experiments suggest that one role of the **ap/pa/pp** cells may be to localize the activity of F and U. Isolation of the **aa** pair suggests that the two **aa** cells interact to specify fate or ensure that the cells each adopt a different fate. Experiments that leave a single **aa** cell indicate that single cells can respond to the identified positional cues, and that interaction between the **aa** cells is not required for the adoption or execution of or fate. Isolation experiments, however, did not identify a 'ground state' for **aa** cells.

Our observations may be consistent with the hypothesis that and lineages represent distinct precursor cell fates. The first division axis may not be critical since essentially

normal and division patterns are observed even if the **aa** cells remain side-by-side and the first division is along an anterior/posterior axis. Even if such lineages ( , ) are considered normal, we have observed several other types of abnormal lineages produced by presumptive and cells. Thus, other interpretations of the data are possible. However, we reject the simple hypothesis that the fate is independently specified in the **aa** cell daughters. Specifically, in one type of abnormal **aa** lineage ('abn-5'), the **aa** cell generates one daughter that produces 2 progeny (like ), and one that produces 3 progeny (like ). These lineages are sometimes observed in animals where the ablation results in the **aa** cells remaining lateral, rather than migrating to the midline. Since the first axis of division in these cells is usually anterior/posterior, as opposed to the normal left/right, this places one daughter of each cell in the anterior position (normally occupied by .(l/r)), and the other daughters in the posterior position ( .(l/r) environment). Nevertheless, lineages with both **aa** cells executing abn-5 lineages (e.g., 2 progeny from the anterior daughter, 3 progeny from the posterior daughter) are rare (1/64 of all animals with abnormal lineages; 1/19 of animals where **aa** cells remain left/right). In addition, many abn-5 lineages show -like timing in the division of both **aa** daughters, but fail to execute the final division on one side, rather than showing -like timing in the daughter with -like divisions and -like timing in the daughter with -like divisions. It is possible that the abn-5 lineages might simply be abortive lineages. In addition to these intermediate lineages, we also observe lineages in which an **aa** cell produces more than six progeny or an abnormal pattern of six progeny (4+2 rather than 3+3). These lineages, which represent 14% of

abnormal **aa** lineages, suggest that the progeny of the **aa** cells may be somewhat responsive to extracellular cues.

### B. Lateral groups (**ap/pa** cells)

A summary of the interactions affecting the **ap/pa** pairs is shown in Fig. 12. Ablation of F and U can sometimes disrupt the fate of the anterior **ap** cells. Ablation of all of the B.a progeny except for the **pa** cells transforms these cells from their normal fate to fate (see Fig. 9B.2). We observed no disruption of fates in these pairs after ablation of Y.p. The F-U-Y.p<sup>-</sup> animals have a slight but not significant enhancement of the F-U<sup>-</sup> effect on the **ap** cells (compare Table 1B.1 with G). However, the fate of the **pa** cells is still not appreciably disrupted.

How do these positional cues interact with the cues from the other B.a progeny? The to transformation observed in **aa**<sup>-</sup>**ap**<sup>-</sup>**pp**<sup>-</sup> (B.a(l/r)a<sup>-</sup>B.a(l/r)pp<sup>-</sup>) animals is dependent on the presence of F and U (Table 1L.3). Although we have not examined F-U-B.a(l/r)a<sup>-</sup>B.a(l/r)pp<sup>-</sup> animals specifically, Y.p does not appear to play a role in **pa** fate specification. F-U-Y.p<sup>-</sup>B.a(l/r)a<sup>-</sup>B.a(l/r)pp<sup>-</sup> ablation isolates the **pa** cells (one on each side), and these cells produce lineages. Thus in the absence of F and U, **pa** cells do not require the other B.a progeny to adopt the fate. In contrast, an F-U-Y.p<sup>-</sup>B.a(l/r)p<sup>-</sup>B.a(l/r)aa<sup>-</sup> ablation isolates the **ap** cells, and these cells usually produce lineages (Table 1L.4).

Both the **ap** and the **pa** cells exhibit plasticity in fate specification. Indeed, since the **pa** cells can adopt the fate normally associated with **ap**, the pairs have some characteristics that might indicate that they form equivalence groups. However, in the absence of all identified cells that influence **pa** and **ap** cell fate, the **ap** and the **pa** cells exhibit distinct fate differences. Thus, either there are as yet unidentified positional cues that somehow distinguish the two cell types, or these cells have distinct fate potentials due to their lineal history.

For the **ap** and **pa** cells, many ablations that result in a disruption of normal fates result in a complete transformation of cell fate. In intact animals, differences between and lineages are apparent soon after division of **ap** and **pa** cells (see Fig. 10). Under experimental conditions, 85% of **ap/pa** cells with disrupted fate produced either \* or \* lineages (24/46 were \*, 15/46 were ). Since \* lineages are not observed in intact animals, \* may be an abnormal (or ) lineage, rather than a distinct 'fate' of its own. However, transformations from to lineages in **pa** cells are apparent in the first division, and are generally complete transformations. The early evidence of fate choice (size and division timing of **ap/pa** cell daughters), along with the high percentage of fate disrupted cells that produce one of three distinct lineages, is consistent with a hypothesis of early commitment to one of a defined set of potential fates. However, it may also simply reflect the relatively simple role of positional cues in the specification of the **ap/pa** fates.

### C. Dorsal group (**pp** pair)

We have identified four distinct activities that are involved in the specification of fate in the **pp** pairs: F/U, Y.p, **pa**, **ap/pa**(**aa**). Ablation of either F/U or the **pa** cells results in

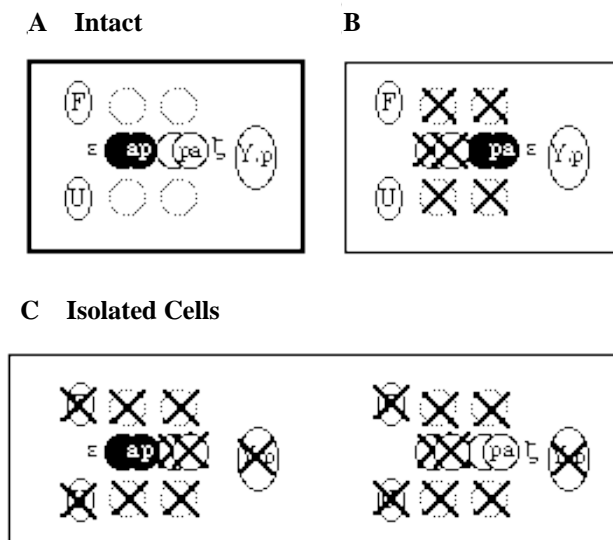

**Fig. 12.** Schematic summary of the effects of ablation of multiple positional cues on the **ap/pa** cell pairs. In intact animals, **ap** cells always adopt fate, and **pa** cells adopt fate (A). If other B.a progeny are ablated, **pa** cells adopt fate (B). This transformation of fate is dependent on the presence of F/U. In the absence of identified positional cues, **ap** cells will usually adopt fate, and **pa** cells will adopt fate. Anterior left, ventral down. Data of Table 1F.1 (B) and L.3,4 (C).

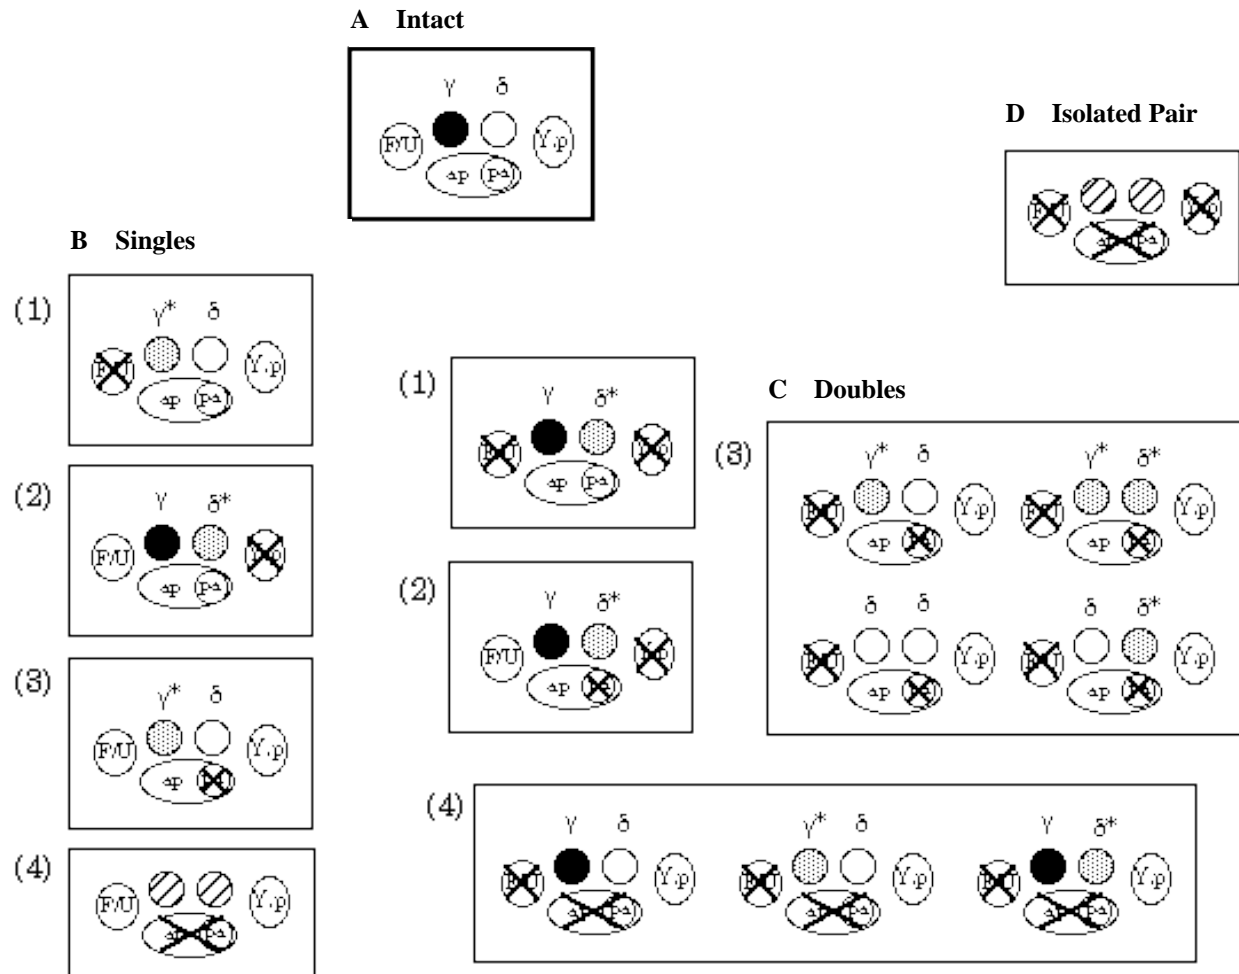

**Fig. 13.** Schematic summary of the effects of ablation of multiple positional cues in the **pp** cell pair. (B.1) Ablation of F/U results in truncated anterior (presumptive  $\gamma$ ) lineages. (B.2) Ablation of Y.p results in extra divisions of posterior (presumptive  $\delta$ ) cells. (B.3) Ablation of **pa** cells results in truncated anterior lineages. (B.4) Ablation of **ap/pa/aa** results in abnormal proliferative lineages in both anterior and posterior **pp** cells. (C.1) Ablation of F/U and Y.p resembles Y.p ablation, although presumptive  $\gamma$  lineages may also be disrupted. (C.2) Ablation of **pa** and Y.p resembles Y.p ablation. (C.3) Ablation of F/U and **pa** randomizes the polarity of pattern. (C.4) Ablation of F/U and **ap/pa/aa** results in variable lineages, but reinstatement of pattern polarity. (D) Removal of all four identified positional cues (F/U, Y.p, **pa**, **ap/pa/aa**) results in abnormal proliferation of both presumptive  $\gamma$  and  $\delta$ . Anterior left, ventral down. Data of Table 1B.1, C.1, E (B); G, I.1-4 (C); I.6,7 (D).

truncation of presumptive  $\gamma$  lineages, so we infer that these cells promote anterior fate in some way. Ablation of Y.p results in extra divisions of presumptive  $\delta$ , and ablation of **ap/pa/aa** results in extra divisions of both presumptive  $\gamma$  and  $\delta$ . Thus Y.p and **ap/pa/aa** promote posterior fate, or otherwise inhibit proliferation. To understand how each of these four components exerts its effect, we have followed the B cell lineage in animals after ablation of two, three, or all four components (Fig. 13).

#### 1. F/U and Y.p

F/U and Y.p provide positional information from outside of the B.a progeny group (Fig. 13B.1,2). Ablation of both F/U and Y.p results in extra divisions of the presumptive  $\gamma$  cell, and occasionally abnormal presumptive  $\delta$  lineages (Fig. 13C.1; data of Table 1G). Thus, the double ablation resembles the single Y.p ablation (although the fate of pre-

sumptive  $\delta$  is not always normal). Therefore, one of the roles of F/U might be to counteract (modulate) the posterior-promoting activity of Y.p on presumptive  $\gamma$ . This activity of F/U is required only in the presence of Y.p. However, while F and U likely have other roles (see below), these experiments indicate that F and U are not necessary for a normal  $\gamma$  lineage. In F<sup>-</sup>U<sup>-</sup>Y.p<sup>-</sup> animals, in contrast to the **aa** cells, the **pp** cells still migrate to their normal anterior/posterior positions. Furthermore, the fact that the anterior cell generally produces a  $\gamma$  lineage and the posterior cell a  $\delta$  lineage indicates that removal of both identified positionally anterior and posterior sources of cues is not sufficient to eliminate anterior/posterior patterning in this pair.

#### 2. Y.p and **pa**

Ablation of the **pa** cells results in truncation of presump-

tive lineages, and ablation of Y.p results in extra divisions of the presumptive cell (Fig. 13B.2,3). In the **pp** pair, the double Y.p<sup>-</sup> **pa**<sup>-</sup> animals resemble Y.p<sup>-</sup> animals (Fig. 13C.2; data of Table 1 I.1). Thus, one of the roles of the **pa** cells is to inhibit Y.p activity from influencing the fate of the presumptive cell. This function is only required if Y.p is present. In addition, this experiment suggests how the positionally posterior **pa** cells can act to promote an anterior fate. The position of the **pa** cells (see Figs 3E, 4B.2) suggests this role may be 'passive.' Specifically, the **pa** cells may physically block the activity of Y.p from reaching the presumptive cell. This proposed mechanism does not require that the **pa** cells be biochemically distinct from the other B.a progeny, although it also does not rule out this possibility.

### 3. F/U and **pa**

Single ablations of either F/U or **pa** result in intermediate and variable disruption of presumptive lineages (Fig. 13B.1,3). To establish whether complete transformations from the to the fate could be achieved by removal of both components, we characterized F-U<sup>-</sup>**pa**<sup>-</sup> animals (Fig. 13C.3; data of Table 1 I.2). While this double ablation does not result in an increased frequency of complete to transformations, the normal pattern of anterior/posterior polarity is disrupted. In either F-U<sup>-</sup> or **pa**<sup>-</sup> animals, the fate of presumptive is not disrupted, whereas presumptive lineages are often truncated. Thus, two patterns are observed: normal polarity and apolar. In contrast, double ablation of F/U and **pa** can result in a fate disruption of both presumptive and cells. In addition, we observe all possible classes of pattern: normal polarity, apolar, and reversed polarity.

### 4. F/U and **ap/pa/(aa)**

Single ablation of **ap/pa/(aa)** results in novel lineages and abnormal proliferation of presumptive and , whereas ablation of F/U results in truncated lineages produced by the presumptive cell (Fig. 13B.1,4). The double ablation of F/U and **ap/pa** or **ap/pa/aa** (considered together as **ap/pa/(aa)**) has allowed us to determine whether the excessive proliferation results in part from inappropriate modulation of F/U information. In F-U<sup>-</sup>**ap**<sup>-</sup>**pa**<sup>-</sup>(**aa**<sup>-</sup>) animals, lineages of presumptive and do not closely resemble those seen in either the single F-U<sup>-</sup> or **ap**<sup>-</sup>**pa**<sup>-</sup>(**aa**<sup>-</sup>) animals (Fig. 13C.4; data of Table 1 I.3,4). Proliferative lineages are not observed. Although many of the lineages are slightly abnormal, we only observe the more common lineages: normal and , and \*/\*. However, the presence of Y.p is not sufficient to ensure fate in the posterior cell. Disruption of both anterior and posterior fates is observed, although not in the same animal. In Section II.C we proposed that the **ap/pa/(aa)** cells have two functions: promotion of posterior fate ( ) and promotion of proper execution of the lineage. The double ablation result indicates that F/U may likewise act at two steps: promotion of anterior fate ( ) and execution of lineage. We hypothesize that one role of the F/U activity for fate execution is to promote **pp** proliferation. The **ap/pa/(aa)** cells counteract this activity, thus localizing it to .a (or .a(l/r)). Since removal of both F/U and **ap/pa/(aa)** results in more normal lineages than either

single ablation, we conclude that F/U and **ap/pa/(aa)** act antagonistically and in parallel on the same process(es).

One consistent characteristic among F-U<sup>-</sup>**ap**<sup>-</sup>**pa**<sup>-</sup>(**aa**<sup>-</sup>) animals is that the fate of the positionally anterior **pp** cell is relatively more 'anterior' than the fate of the positionally posterior **pp** cell; the pair exhibits polarity of pattern. In other words, anterior/posterior polarity, which is lost in F-U<sup>-</sup>**pa**<sup>-</sup> animals, is regained by the additional ablation of the **ap** (compare Fig. 13C.3 with C.4). Y.p, the posterior-promoting cell, can promote polarity in the **pp** pair in the absence of F/U and **ap/pa/(aa)**. Since polarity can be disrupted in F-U<sup>-</sup>**pa**<sup>-</sup> animals, the presence of **ap** must somehow counteract this activity of Y.p.

### 5. F/U, Y.p, and **ap/pa/(aa)**

We have removed all of the identified components that specify fate in the **pp** pair (Fig. 13D). As with the **aa** pair, this isolation may allow identification of potential interaction between **pp** cells. The normal lineages and patterning observed in F-U<sup>-</sup>**ap**<sup>-</sup>**pa**<sup>-</sup>(**aa**<sup>-</sup>) animals are lost with the removal of Y.p (Table 1 I.6,7). A variety of proliferative lineages are observed from both presumptive and . Although there is no appreciable difference between presumptive and presumptive , proliferation may be less than in **ap**<sup>-</sup>**pa**<sup>-</sup>(**aa**<sup>-</sup>) animals. Thus, without the identified cues, no polarity or evidence for interaction between the **pp** cells is readily apparent. However, the lineages are abnormal and variable enough that they are not easily interpreted.

A difference between the **aa** and **pp** cells is that the **pp** cells generally migrate to anterior/posterior positions even in the absence of the identified extracellular cues. Although this may indicate that anterior/posterior patterning cues for the **pp** cells may still be present, it may also reflect a difference in the physical environments within which the two pairs reside. The ventral area (**aa** environment) is relatively smaller and more crowded than the dorsal area (**pp** environment). Thus, in the absence of positional cues the **aa** cells might not be able to migrate medially, whereas the **pp** cells can. We cannot, however, rule out the possibility that additional cues exist for **pp** cells.

### 6. Interaction between **pp** cells

#### a. B.al<sup>-</sup> or B.ar<sup>-</sup> background

Isolation of both **pp** cells did not provide direct evidence that they interact with each other to specify their fates. However, we have also characterized the lineages of single **pp** cells obtained after ablation of the precursor B.al or B.ar (Table 1K). Four of five single **pp** cells obtained by ablation of B.al or B.ar produced a lineage, whereas one produced a lineage. Thus, interaction between **pp** cells is not essential to produce either normal or fates. In these animals, it is possible that choice between the two fates is related to the relative anterior-posterior positioning of the single **pp** cell in the normal **pp** environment. Adoption of the fate, however, is dependent on the presence of F and U. Remaining **pp** cells in F-U<sup>-</sup> [B.al<sup>-</sup> or B.ar<sup>-</sup>] animals produce lineages (5/7) or \*/\* lineages (2/7). Likewise, the fate is dependent on the presence of Y.p. Single **pp** cells in F-U-Y.p<sup>-</sup> [B.al<sup>-</sup> or B.ar<sup>-</sup>] animals produce \*/\* (3/4 \*/\*; 1/4 abn-3) lineages. We do not believe this

effect is merely the result of fewer neighbors (or more debris), because even single isolated **pp** cells can produce lineages (see below). These observations are consistent with the proposed roles of F/U and Y.p in promoting and fates, respectively.

Loss-of-function mutations in *lin-12*, a gene known to play a role in the interactions between cells in other equivalence groups, result in fate transformations (Greenwald et al., 1983). This observation implies that the **pp** cells do interact, by analogy to other *lin-12*-dependent equivalence groups. Although isolation of the two **pp** cells did not offer evidence to support this hypothesis, comparison of F-U-Y.p<sup>-</sup> to F-U-Y.p<sup>-</sup>[B.al<sup>-</sup> or B.ar<sup>-</sup>] animals is suggestive. Specifically, the single **pp** cells in F-U-Y.p<sup>-</sup>[B.al<sup>-</sup> or B.ar<sup>-</sup>] animals do not produce lineages (0/4 are ), whereas in F-U-Y.p<sup>-</sup> animals, where both **pp** cells are present, the anterior cell generally will produce a lineage (4/5). Although these animals also differ in the total number of B.a progeny present, we suggest that the fate in the F-U-Y.p<sup>-</sup> animals may result from interaction between the two **pp** cells. If the **pp** cells do interact, it is possible that the interaction is not apparent in **ap**<sup>-</sup>**pa**<sup>-</sup>(**aa**<sup>-</sup>) animals because the **ap**/**pa**/**aa** cells are necessary either for this interaction to occur, or for all aspects of the fates to be properly executed.

#### b. Isolated B.a(l or r)**pp**

After ablation of F/U, Y.p, and all B.a progeny except a single **pp** cell, we observed -like lineages in two of five animals, and abnormal proliferative lineages in three of five animals (Table 1L.2). We conclude that a **pp** cell requires positional cues to adopt the correct fate. Although the isolated fate can be -like, extracellular cues are apparently required to reliably ensure that the fate is properly executed. As is the case for isolated **aa** cells, there is no clear 'ground state' for the **pp** cells.

### 7. Summary of experiments in the dorsal group

The results of our removal of identified components of fate specification for the **pp** pair suggest how some of the cues may interact. The **pa** cells likely promote anterior fate by inhibiting or localizing the activity of Y.p, and the **ap** cells likewise may inhibit or localize the activity of F/U. One of the roles of F and U is to counteract Y.p. However, F and U have additional roles in the promotion of fate. For instance, comparison of **ap**<sup>-</sup>**pa**<sup>-</sup>(**aa**<sup>-</sup>) to F-U-**ap**<sup>-</sup>**pa**<sup>-</sup>(**aa**<sup>-</sup>) animals, both of which have Y.p intact, suggests that F and U play a role in producing the abnormal, proliferative lineages. Likewise, although F and U are not required for the production of lineages in F-U-Y.p<sup>-</sup> animals, in a [B.al<sup>-</sup> or B.ar<sup>-</sup>] background, lineages are only seen if F and U are present.

In most experimental animals the cells move roughly anterior/posterior relative to each other, as in intact animals. This movement allows the additional analysis of patterning and polarity within the **pp** pair. Removal of the positionally anterior and posterior F/U and Y.p cells still results in normal polarity within the **pp** pair. Thus either additional, unidentified cues can establish this polarity, or polarity information can come from the other B.a progeny. Analysis of F-U-**pa**<sup>-</sup> animals suggests that the latter explanation

may indeed be the case, since the pattern appears random in these animals. However, polarity is restored after removal of the **ap** cells in this background. Therefore positional cues are not absent in the F-U-**pa**<sup>-</sup> animals, but they are either inhibited or somehow equally balanced. There is no obvious polarity in F-U-Y.p-**ap**<sup>-</sup>**pa**<sup>-</sup>(**aa**<sup>-</sup>) animals. However, the abnormality of the resultant lineages makes it difficult to score polarity.

Although there is some evidence for lateral interactions between the **pp** cells, the ablation results are less conclusive in the **pp** pair than in the **aa** pair. Experiments that include a single **pp** cell suggest that interaction between the **pp** cells is not necessary for the specification of and fates, and isolation of the **pp** pair does not provide evidence that the homologues interact. However, in F-U-Y.p<sup>-</sup> animals lineages are observed if both **pp** cells remain, but not if only one remains, suggesting that the two **pp** cells may have the potential to interact.

In contrast to our initial hypothesis, we believe that specification of **pp** lineages involves two steps based on (1) the nature of the \*/\* lineages, and (2) the existence of the abnormal proliferative lineages. The aspects of **pp** cell fate that we have used in our analysis are the axis of **pp** cell division (sagittal versus transverse; see Table 1 legend) and the number of progeny produced by each **pp** cell. Considering these criteria, \*/\* lineages include characteristics of both and lineages: the initial division is transverse (-like), but each cell divides again. Thus the **pp** division axis can be uncoupled from the number of progeny produced. Similarly, \*/\* lineages have an initial sagittal division (like normal lineages), but only two rounds of division. In abnormal proliferative lineages the **pp** cell produces up to eight progeny. Although the first division of an abnormal proliferative lineage is often sagittal (-like), the axes and timing of divisions and the placement of progeny are highly variable. We propose that these abnormal types of lineages reflect two steps in lineage specification: an earlier step (possibly reflected in division axis) and a later step (reflected in proliferation). This two step process model of lineage specification distinguishes the **pp** pair because it suggests that and fates do not result from the simple choice and execution of distinct sublineages, but rather a series of decisions influenced by extracellular cues. Thus although and are distinct **pp** fates, they do not represent distinct sublineages.

### IV. Differences between B.a(l/r)a and B.a(l/r)p

Our ablation results suggest that there is a fundamental difference in fate potential between the **aa** pair and the **pp** pair. For instance, single isolated **aa** cells generally produce -like lineages (average number of progeny=4.4), whereas single isolated **pp** cells generally produce more proliferative and variable lineages (av. prog.=6.2). The cells also respond differently in the same ablation backgrounds. In addition, although the siblings of the **aa** cells (**ap**) and the siblings of the **pp** cells (**pa**) can respond to extracellular cues, the behavior of these cells when isolated from the identified cues suggests that they may also be inherently different from one another. Specifically, isolated **pa** cells produce lineages, and isolated **ap** cells generally produce lineages, the fates associated with these cells in intact animals. Since we now

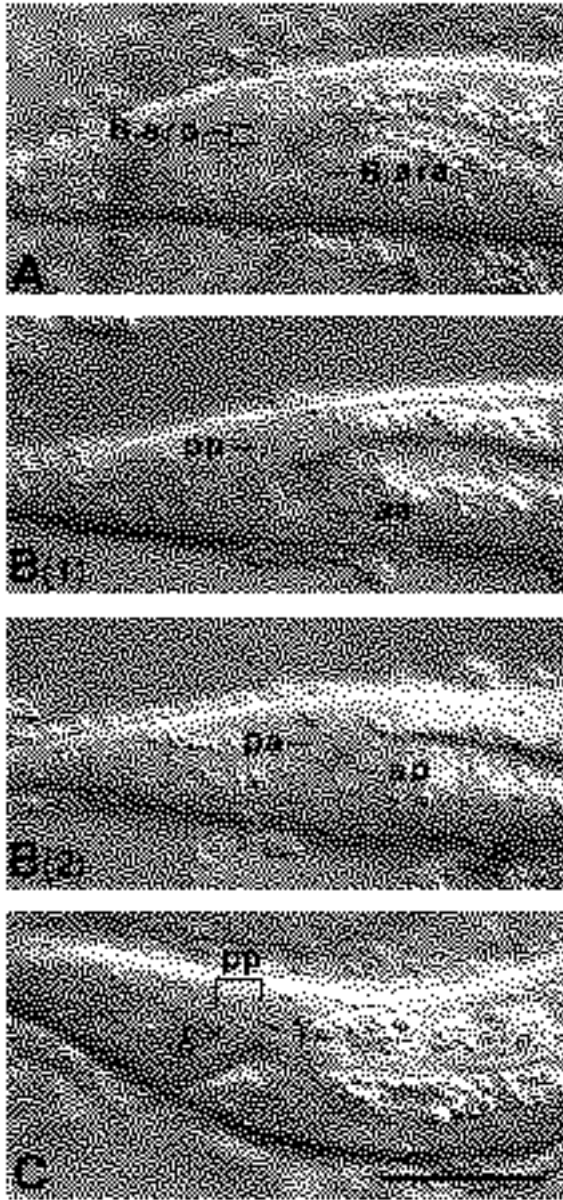

**Fig. 14.** Nomarski photomicrographs illustrating (A) the difference between B.a(r)p and B.a(r)a in timing of cell division and (B, C) the migration of the 8 B.a progeny. Anterior is to the right, ventral down (right lateral view). (A) B.a(r)p divides prior to B.a(r)a. (B) After both B.a(l/r)a and B.a(l/r)p have divided, B.a(l/r)aa and B.a(l/r)pp are positioned left/right prior to migration (B.1; compare with Fig. 4B.1) and B.a(l/r)ap and B.a(l/r)pa are approximately dorsal/ventral (B.2; compare with Fig. 4B.2). The cells then migrate to their anterior/posterior positions. The **pp** cells are migrating (C). In this animal, B.a(r)pp will be **aa**, and B.a(l)pp will be **pp**. Scale bar, 20  $\mu$ m.

have a handle on some of the conditional components of fate, we can consider what may reflect an autonomous component of fate specification for these cells.

A simple event that could account for the inherent difference(s) between the **aa** and **pp** cells, and between the **ap** and **pa** cells, is that a difference in fate is established between the precursors B.a(l/r)a and B.a(l/r)p. We have

**Table 6.** Bilateral symmetry in  $\alpha/\beta$  and asymmetry in  $\gamma/\delta$  fates

| <b>B.alpp fate</b> |          |              |                                        |
|--------------------|----------|--------------|----------------------------------------|
| <b>B.alaa fate</b> |          | <b>total</b> |                                        |
|                    | <b>5</b> | <b>5</b>     | <b>10</b>                              |
|                    |          |              | $\chi^2 = 0.18$ (1 d.f.)<br>$p > 0.5$  |
|                    | <b>1</b> | <b>11</b>    | <b>12</b>                              |
| <b>total</b>       | <b>6</b> | <b>16</b>    | <b>22</b>                              |
|                    |          |              | $\chi^2 = 4.54$ (1 d.f.)<br>$p < 0.05$ |
|                    |          |              | $\chi^2 = 4.78$ (3 d.f.)<br>$p > 0.1$  |

The table indicates the fate of the left cell observed through migration of the **aa** and **pp** cells. For instance, of 22 animals observed, in 11, B.alpp adopts the posterior position ( ) and B.alaa adopts the posterior position ( ) (implicitly, B.arpp adopts the anterior position ( ) and B.araa adopts the anterior position ( ) in these animals).  $\chi^2$  calculated for **pp** and **aa** fates independently, and dependently. Fate choice in the **aa** pair is random. Fate choice in the **pp** pair is skewed. B.alpp was observed to adopt the posterior position 73% of the time. Fate choice in the **aa** pairs is independent of **pp** choice.

closely examined the behavior of these cells to identify whether there are any observable differences that would be consistent with this hypothesis. Analysis of the timing of the division of the B.a(l/r)a and B.a(l/r)p cells suggests that the two pairs of cells, although morphologically similar, have acquired observable differences by this stage. Specifically, B.a(l/r)p always divide prior to B.a(l/r)a (mean time difference=16 minutes ( $n=22$ ), Fig. 14A). Although in rare cases (3/44 sides) a posterior cell divides at about the same time as the anterior cells, they never divide after the anterior cells. One component of cell state - timing of division - clearly differs between the B.a(l/r)a and B.a(l/r)p cells, and thus the precursors of the **aa** and **pp** cells are distinct. These results are consistent with the observations of Sulston and Horvitz (1977) and Sulston et al. (1980).

The animals examined for timing of B.a(l/r)a and B.a(l/r)p divisions were also observed through the migration of the B.a(l/r)xx cells (Fig. 14 B, Table 6). Our results suggest that although both left and right **pp** cells can adopt the anterior position, the probabilities are not equal: B.arpp adopted the anterior position (and **aa** fate) 16/22 times (73%). The biological relevance of this apparent bias is not clear. **aa** cells adopted anterior and posterior positions randomly, and there is no correlation between anterior/posterior choice adopted by the **aa** pair and the **pp** pair.

## DISCUSSION

### I. Multiple cell interactions specify B.a(l/r)xx fates: a model

We have characterized fate specification in three distinct

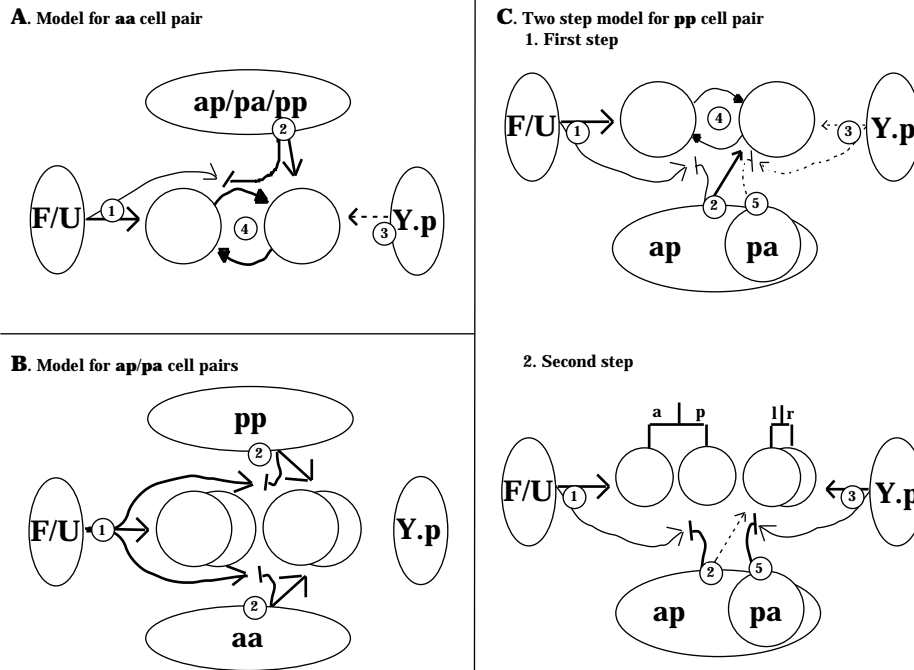

**Fig. 15.** A model for fate specification in the three cell pair types (anterior left, ventral down). Refer to text for more complete discussion. Positional cues and lateral interactions indicated with arrows. Modulatory interactions indicated with bars. Dashed lines indicate a weaker effect. In general the B.a progeny are indicated to have two effects (function both as a positional cue and a modulator). This may reflect their potential role as 'insulators' as well as providers of an active positional cue. The relative requirement for each function may be different in each of the three pairs. (A) In the **aa** pair, F/U (1), B.a progeny (2), and possibly Y.p (3) provide positional cues. The other B.a progeny (2) modulate F/U information (shown as blocking F/U cue). The two **aa** cells also interact with each other (4). This model does not take into account the possibility of later interactions required for

maintenance of fate choice. (B) In the **ap/pa** pairs, F/U (1) and possibly the other B.a progeny (2) provide positional cues. The B.a progeny may modulate or localize cues from F/U (2). (C) A two step model for the **pp** pair. In the first step, F/U (1) and the B.a progeny (2) provide positional cues. The B.a progeny may act to modulate F/U activity (2). The two **pp** cells may also interact with each other (4). We envision that the second step of fate specification occurs in the progeny of the **pp** cells. In this step, F/U (1) and Y.p (3) (and possibly the B.a progeny (2)) provide positional cues. The other B.a progeny regulate F/U (2) and Y.p (5) information (not included in Fig.). Note that some components of the two steps may be temporally or functionally overlap. As drawn, the models indicate that interactions take place at the B=10 cell stage for the **aa** pair (A) and the **ap/pa** pairs (B). This is consistent with the data, although the possibility that interactions occur later cannot be ruled out. Likewise, the timing of fate specification in the two step model for **pp** cells (C) is consistent with the data, but not the only possibility. We have interpreted the results in terms of promotion and transformation of distinct fates. However, a more conservative interpretation which considers only whether a lineage is disrupted (such as in Tables 3, 4, and 5) yields a similar model. We have not ruled out the possibility that the function(s) that we have ascribed to F, U, and Y.p may actually be due to a subset of progeny of these cells. Although this is possible, it would not change our interpretation of how fate is specified in the eight B.a progeny. In addition, we have not ruled out the possibility that the 'activities' we have identified are mediated by multiple gene products or biochemical mechanisms. The different functions of a particular cell might be mediated by different genes, or a single function might be mediated by multiple processes. These issues, as well as the validity of the current model, may be addressed by genetic analysis of the system. Many of the ablations result in spicule abnormalities (for example, see Fig. 1; other data not shown), indicating that the system is amenable to mutant isolation and characterization.

pairs of cells generated in the B cell lineage of the *C. elegans* male: **aa**, **ap/pa**, and **pp**. Our results suggest that multiple cell interactions (positional cues, their modulators, and lateral interactions) specify fate in the B.a(l/r)xx pairs. Although **aa** fates ( / ) and **ap/pa** fates ( / ) may result from one specification step, **pp** fates ( / ) require a two-step specification process. Fig. 15 illustrates a possible interpretation of how fate is specified by extracellular cues in the three B.a(l/r)xx cell pairs.

**aa** pair (Fig. 15A): For the **aa** pair, we envision that the two cells of the pair interact to establish a pattern of one -like and one -like cell by a lateral signalling mechanism (labelled 4); analogous to anchor cell specification in the *C. elegans* hermaphrodite; Seydoux and Greenwald, 1989). Positional cues overlay this interaction so it is skewed to always form the same anterior/posterior pattern. **ap/pa/pp** (and Y.p) act to generally promote posterior ( ) fate (2, 3), and F and U act to override this effect and locally promote fate (1). The integration of these two types of cues could

be entirely within the **aa** cells themselves, although the **ap/pa/pp** cells may also act to modulate or localize the F/U signal.

**ap/pa** pairs (Fig. 15B): There are two identified positional cues that act in the **ap/pa** pairs. F and U act to promote fate in both **ap** and **pa** (1), and the other B.a progeny act to promote fates in **pa** (2). Since 'isolated' **ap** and **pa** cells adopt and fates, respectively, one part of F/U function may be to counteract the activity of the other B.a progeny. In addition, the B.a progeny cells may act to inhibit or localize the activity of F and U (2). We cannot conclude whether the **ap** and **pa** cells interact actively.

**pp** pair (Fig. 15C): We propose two distinct steps in / fate specification, which may correspond to specification in **pp** cells, and in the **pp** cell daughters. In the first step, F/U promote anterior fate (1) and **ap/pa/aa** promote posterior fate (2). The **ap/pa/aa** cells may also act to modulate or localize F/U activity at this step. The two **pp** cells may also interact with each other (4). Although the initial predilec-

tion for or fate may be specified in the first step, proper execution of the fates requires a second step. In the second step, F and U promote anterior fate (1), and Y.p promotes posterior fate (3). The **ap** and **pa** cells act to modulate or localize these two potential cues (2, 5). The role of the **pa** cells is to prevent Y.p activity from extending inappropriately to the anterior **pp** cell. Both the **ap** and **pa** cells act to localize F/U activity to the anterior daughter (or granddaughters) of presumptive . We envision that these functions may be achieved by physically preventing the activities from reaching the inappropriate cells ('insulation'), although a variety of more active blocking or localization mechanisms are not excluded. F and U also appear to have a role in modulating cues produced by Y.p (not drawn in Fig.). This could be either direct or indirect. In the latter case, F and U might promote fate to the exclusion of fate. Although the two steps of **pp** fate specification are distinct, some of their components may temporally or functionally overlap.

## II. Properties of the identified extracellular cues

### The relationship among the cues

Our model results in part from interpretation of lineages observed in multiply ablated animals. These experiments can address the specific nature of an interaction. For example, with respect to the **pp** cell fates, the result of double Y.p **pa** ablation resembles that of single Y.p ablation. The order of action of these two cues depends on interpretation. Although the Y.p activity can be interpreted to act before the **pa** activity, we prefer the simpler interpretation that **pa** is a negative modulator of Y.p activity. This interpretation places the activity of Y.p after, or concurrent with, the activity of the **pa** cells, and does not require that the **pa** cells be biochemically distinct from the **ap** cells or from the other B.a progeny.

The activities produced by F/U and the B.a progeny may act in parallel. This can be illustrated in the **pp** pair, where the lineages in F<sup>-</sup>U<sup>-</sup>**ap**<sup>-</sup>**pa**<sup>-</sup>(**aa**<sup>-</sup>) animals are distinct from those seen in either single F<sup>-</sup>U<sup>-</sup> or **ap**<sup>-</sup>**pa**<sup>-</sup>(**aa**<sup>-</sup>) animals. Specifically, ablation of F/U results in truncated lineages from presumptive , and ablation of **ap**/**pa**(**aa**) results in abnormal proliferative lineages for both presumptive and . The double F/U **ap**/**pa**(**aa**) ablation results in abnormal lineages less extreme than in either of the single ablations. The abnormal proliferation is not apparent, but the cells generally exhibit more 'anterior-like' fates than in F/U ablations, and the fate of presumptive cells can be disrupted. If the F/U cue and **ap**/**pa**(**aa**) cue acted in a linear pathway, we would expect the effect produced by one ablation to be epistatic to the other, as in Y.p<sup>-</sup> **ap**<sup>-</sup> animals. If the activities acted independently but at distinct steps, or on different cells, we might expect an additive effect in the doubly ablated animals. Since the double ablation more closely approximates to normal patterning than either single ablation, it suggests the activities may act in parallel and antagonistically on the same process (for example, see Kenyon, 1986).

### Active extracellular cues in the specification of B.a(l/r)xx fates

Although many of the identified 'activities' may actually

represent multiple biochemical products, it is useful to establish the minimum number of *active* products proposed by the model. We infer that a particular cue is active if the following two criteria are met: (1) ablation of the cell(s) that provides it results in fate disruption, and (2) double ablation experiments indicate that it can act independently of other cues. Of the five distinct interactions that specify fate in the B.a(l/r)xx cells, we propose that at least four are active: cues from F/U, B.a progeny, Y.p, and lateral interactions (Fig. 15). (1) The activity of the F/U cue is suggested by the parallel function of F/U and B.a progeny in the **aa** and **pp** pairs, by its ability to promote fate in **pa** cells, and by its ability to promote the abnormal proliferative lineages in **pp** cells. (2) The activity of the B.a progeny cue is suggested by the parallel function of F/U and B.a progeny in the **aa** and **pp** pairs. In the **ap**/**pa** pair, only the modulatory function of the other B.a cells may normally be required. (3) The activity of the Y.p cue is suggested by its interaction with other activities (e.g., F/U), and by its ability to promote the pattern of **pp** cells in F<sup>-</sup>U<sup>-</sup>**ap**<sup>-</sup>**pa**<sup>-</sup>(**aa**<sup>-</sup>) animals. (4) A lateral interaction is suggested in the **aa** cells in the patterning of fates in F<sup>-</sup>U<sup>-</sup>Y.p<sup>-</sup>**ap**<sup>-</sup>**pa**<sup>-</sup>**pp**<sup>-</sup> animals. (5) The role of the **pa** cells in promoting fate is not independent of Y.p. Thus it might not represent an active process.

### Redundancy of the extracellular cues

Our ablation experiments have revealed three instances of redundancy in extracellular cues. F and U are embryonic sister cells, and despite different lineages, they produce many common progeny types, including similar neurons (the EF and DX male specific neurons) and cells that play a role in the death of neighboring cells (Sulston et al., 1980). F and U behave similarly in their interactions with the B.a(l/r)xx cells, thus in terms of 'F/U activity' we consider them to be duplicate cells with identical function.

The B.a progeny sets provide the second example of redundancy. It involves a relatively large but specifically characterized set of cells that are present (but not essential) as a group. Like F and U, they are lineally related. Although these cells share many characteristics, distinct differences in B.a(l/r)xx precursors and in terminal fates are evident during development of B.a. The redundancy is best seen in the **aa** pair, where any pair of the six other B.a cells is sufficient to specify fate. However, the 'B.a progeny' cue acts distinctly on each of the three cell pairs. Any pair of B.a(l/r)xx cells is not always sufficient to promote posterior fate in the **pa** cells, and the six cells are not equivalent in their action on the **pp** pair. We envision that the B.a progeny may serve more than one role (for instance, an active role plus a passive, 'insulating' role). Thus this redundancy may reflect redundancy of position (neighboring cells are present, regardless of fate) as well as redundancy of a common positional cue. The relative requirement for, or responsiveness to, these two distinct functions may differ among the three types of cell pairs.

The cues involved in **aa** anterior-posterior patterning are distinct. Ablation of F/U, for instance, results in a different effect on **aa** fate than ablation of Y.p or **ap**/**pa**/**pp** (compare Fig. 6 and Table 2 with Fig. 9 and Table 3). Therefore, the redundancy of this system is not a common activity



**Table 7. Summary of cells that provide positional cues and the fates they promote**

| Cell(s)  | Promote fate |     |    |    |       |    |
|----------|--------------|-----|----|----|-------|----|
|          | aa           |     | pp |    | ap/pa |    |
|          |              |     |    |    |       |    |
| F/U      | ++           | -   | ++ | -  | +     | -  |
| Y.p      | -            | +/- | -  | ++ | -     | -  |
| pa       | -            | -   | ++ | -  | -     | ×  |
| ap/pa/aa | ×†           | ×†  | ++ | ++ | ×     | ×  |
| ap/pa/pp | -            | ++  | ×  | ×  | ×     | ×  |
| aa/ap/pp | ×            | ×   | ×  | ×  | ×     | ++ |

The role of a cell in promotion of a particular fate is inferred from the effects observed following cell ablation. ++, strongly promotes fate. +, weakly promotes fate. +/-, may play a minor role in promoting fate. -, does not play a role in promoting fate. x, cell is absent. †If they are present, the **aa** cells are not affected.

shared by the three components, but rather different pieces of information about anterior-posterior position. For instance, if **ap/pa/pp** cells are present, either F/U (anterior cue) or Y.p (posterior cue) provides sufficient information about the environment for proper migration. The '2 of 3' aspect of this system may reflect a precise sensitivity of the cells to the positional cues. Alternatively, it may result because the **ap/pa/pp** cells modulate or localize the F/U and Y.p cues. Specifically, if only one of F/U or Y.p is present, then the modulatory role of the **ap/pa/pp** cells is required to establish a gradient of F/U or Y.p cue. If both F/U and Y.p are present, the **ap/pa/pp** activity is not necessary because the F/U 'anterior' and Y.p 'posterior' cues are distinct, and can establish asymmetry in the **aa** environment.

#### The permissive nature of the extracellular cues

In general, removal of several distinct cells or groups of cells can disrupt specific B.a progeny fates (Table 7). For instance, disruption of presumptive lineages results from ablation of F/U, **pa**, or **ap/pa/aa** (see Figs 6, 9; Tables 2, 5). Likewise, presumptive lineages are disrupted by ablation of either Y.p or **ap/pa/aa**. All of these cues are not entirely necessary for a specific fate, however. For instance, 2/5 **pp** cells isolated from all identified positional cues produced -like lineages (Table 1L.2). **pp** cells thus retain the potential to adopt fate. Nevertheless, the integration of multiple extracellular cues, combined with the cells' inherent potential, is required for proper, consistent execution of **pp** cell fate.

Is any particular cue *necessary* and/or *sufficient* to specify any given fate? Y.p is necessary, though not sufficient, for fate. F/U is necessary, and possibly sufficient, for fate in **pa**, though clearly not in **ap**. No cells or combination of cells is entirely necessary or sufficient for , , and fates. We thus consider most of the interactions in terms of 'promotion' of one fate choice over another.

**Table 8. Differentiated fates of B progeny**

| Precursor | Differentiated Fates |       |       |          |
|-----------|----------------------|-------|-------|----------|
|           | N                    | N.Sup | Proct | Death    |
|           |                      | 2     | 2     |          |
|           | 2                    | 4     |       |          |
|           |                      | 2     | 3     | 1        |
|           |                      |       | 2     |          |
|           |                      |       | 5     | 1 + (1)† |
|           | 3                    | 2     |       |          |

N, neuron; N. Sup, neuronal support cell (socket or sheath cell); Proct, proctodeal cell; Death, cell that undergoes programmed cell death. For example, a lineage produces 6 progeny: 2 neurons and 4 neuronal support cells (2 socket and 2 sheath cells). †Each lineage includes one invariant and one conditional death (either the left or the right cell will die, but not both). Thus combined, the lineages produce a total of 3 cell deaths. Data of Sulston et al. (1980).

The differences of the responses from the three cell pairs suggest that the extracellular cues promote specific choices between neuroectoblast fates rather than promoting proliferation or the production of a specific differentiated cell type *per se*. For example, F and U act to increase proliferation in the case of **pp** and **ap/pa** cells (promote and ), but decrease proliferation in the case of **aa** cells (promote ) (see Fig. 2). Likewise, F and U do not appear to promote specific precursor or differentiated cell types. In intact animals, there are three general cell types in the progeny of B.a: neurons, neuronal support cells, and proctodeum (epidermis) (Sulston et al., 1980). However, neurons, for instance, arise at several positions in the lineage rather than from a single neuroblast precursor (Table 8). Even if one considers neurons and support cells as a common 'neuronal' type, and are neuronal precursors, and are proctodeal precursors, and and are 'mixed,' producing both neuronal and proctodeal progeny. In addition, ablation of F and U disrupts the more neuronal lineage in the **pp** pair, but the more proctodeal lineage in the **ap/pa** pairs.

### III. Equivalence groups and specification of the pairs

An equivalence group is a set of identical cells that are equally capable of executing a shared set of fates (Sulston and White, 1980; Kimble, 1981; Blair and Weisblat, 1984; Shankland and Weisblat, 1984; Doe and Goodman, 1985; Nishida and Satoh, 1989). These cells have equivalent developmental potential, and extracellular cues dictate the eventual fate. Are the **aa**, **ap/pa**, and **pp** pairs equivalence groups? The **aa** pair and the **pp** pair both exhibit natural variation in fate. Ablation experiments of Sulston and White (1980) indicate that the cells of the **aa** pair also exhibit a hierarchy of fates, with 1°, and 2°. Thus, these cells likely represent an equivalence group in the strict sense. In contrast, similar experiments with the **pp** pair were unable

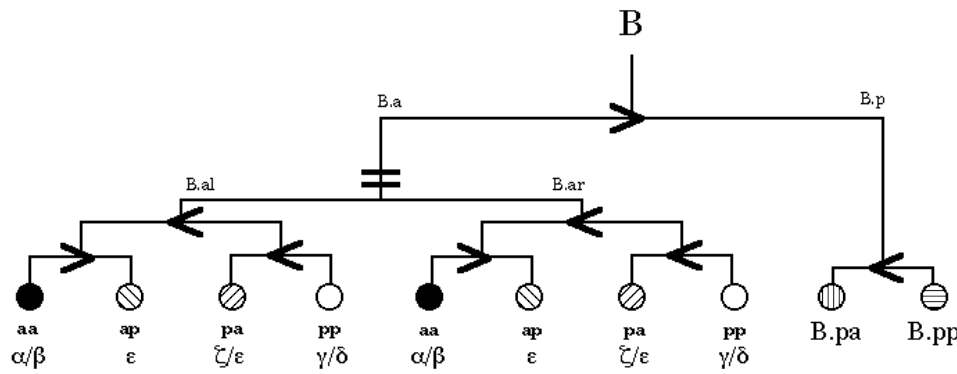

**Fig. 16.** Lineage illustrating the asymmetries in the B lineage necessary to produce the eight B.a progeny types. = represents equational division; > or < represent non-equational divisions, but do not necessarily indicate that the daughter cells are of different size. In the case of the division of B, however, cytokinesis is unequal, producing a larger anterior (B.a) and smaller posterior (B.p) cell. Although positional cues specify fate choice within, for example, the **pp** pair, the **aa** and **pp** cells are distinct. Thus additional components of fate specification (indicated abstractly by > or <) must also play a role. Since differences are apparent in the precursors of these cells (B.a(l/r)a and B.a(l/r)p), some of these components may be autonomous to the B.a(l/r)xx cells.

to establish a fate hierarchy. Although in the first step of **pp** fate specification the cells may be equivalent, our results indicate that there are two steps in the specification of and fates. Thus it is impossible to interpret the fates in simple terms of 1° and 2° fates.

The **ap/pa** pairs exhibit replacement regulation, a characteristic often associated with cells in an equivalence group (e.g., Sulston and White, 1980). Specifically, **pa** cells will produce lineages in the absence of the other B.a progeny. However, under experimental conditions the **ap** cells have never produced lineages. Although both cells respond to positional cues, F and U are required to promote the transformation to fate in **pa**, whereas the **ap** cells can produce normal lineages in the absence of F and U. Our experiments do not completely rule out the ability of **ap** to adopt fate. Nevertheless, after isolation of the cells by removal of all identified positional cues, the **ap** cells adopt their normal fate, and the **pa** cells the fate. Thus, the **ap** and **pa** may not be functionally equivalent. **pa** may have the potential to adopt both and fates, whereas **ap** could be restricted to the fate. If this is the case, then these cells represent an example of replacement regulation without equivalent potential.

What is the relationship among the three pairs? We propose that each B.a(l/r)xx cell is competent to make a particular choice of fate ( versus , versus , versus ), and this competence results from an earlier specification event. First, the cells of a given pair (e.g., **aa**) respond to specific cell ablations (e.g., Y.p<sup>-</sup>) with different intensity than the cells in the other pairs (e.g., **pp**). Second, the behaviors of **aa**, **pa**, **ap**, and **pp** cells in 'isolated' backgrounds are distinct (see Results, Section III). Third, in general there are no obvious examples of a cell of one pair that adopts the fate normally associated with another pair. Although some lineages share some superficial characteristics, we do not believe that any disrupted lineages ever represent transformation of fate potential from one pair to another. Since the three cell pairs appear to be different, distinct fate specification events may take place in the early progeny of B to distinguish, for instance, the **aa** pair from the **pp** pair (Fig. 16). These distinctions might be autonomously specified. Division of B.a establishes the left/right symmetry of the spicules, and produces two appar-

ently identical daughters. This equational division produces two cells that each produce a set of four progeny. To obtain four distinct progeny types, both rounds of division must be asymmetric, i.e., give rise to different progeny types. Although, as yet unidentified cell interactions may be responsible for these distinctions, the difference in the timing of B.a(l/r)p division compared with B.a(l/r)a indicates that these precursors of the B.a(l/r)xx cells already have distinct cell states.

#### IV. Signal integration: three general types of cell interactions

We have demonstrated that the B.a(l/r)xx cell fates are specified by three distinct types of cell interactions: (a) positional cues, (b) modulators of positional cues, and (c) lateral cues (Fig. 17). Positional cues are unidirectional, or at least the cells producing them are not responsive to direct feedback as a result of exposure to the cue (in contrast to lateral cues). Active 'signals' - so called inducers and inhibitors - represent positional cues. Modulators act to localize or otherwise modify the activity or effect of a positional cue. Their unique characteristic is that this function is dependent entirely on the presence of the positional

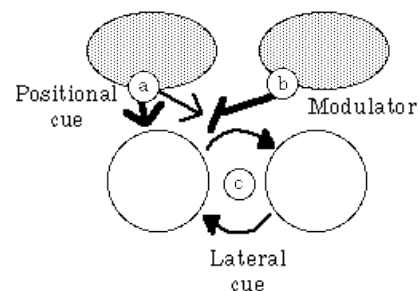

**Fig. 17.** Three general types of intercellular signals. (a) Positional cues: inducers, inhibitors. These cues provide unidirectional positional information. (b) Modulators: active or passive. Modulators act on positional cues. Their function is dependent on the presence of the positional cue. (c) Lateral signals. These signals act reciprocally among cells of equivalent potential, and include a feedback mechanism. See text for additional discussion.

cue. Modulators can be active (e.g., production of an enzyme that degrades or modifies the positional cue) or passive (e.g., insulators that physically block another cell's access to the positional cue). Lateral cues are reciprocal (at least initially) between cells of equivalent potential, and include a feedback mechanism. Feedback can be inhibitory, and thus result in the amplification of a discrepancy between the cells (Seydoux and Greenwald, 1989; Heitzler and Simpson, 1991), or excitatory, and thus result in the amplification of a particular effect in both (all) cells. In general, complexity may arise from the fact that there may be multiple positional cues, all acting in parallel, as well as multiple modulators, and so on. In addition, the actual units of specification may be layered so that fates may result from a series of discrete specification steps.

In the B.a(l/r)xx cells, we observe examples of cues that act in series as well as in concert at the same step of fate specification. The cues involved in the first and second steps of **pp** cell fate specification act in series. Modulators, in contrast, act at the same step as the activities they modulate. In addition, some activities (e.g., those produced by F/U and B.a progeny) may act in parallel and antagonistically on the same process, and thus act at the same step. Lateral interactions may also be concurrent with the positional cues in the B lineage. Since in both **aa** and **pp** cells all fates ( / and / ) are observed in animals with just a single cell of the pair present, lateral interactions are not necessary for any fate. Thus, in this case the normally precise pattern of fate is unlikely to result from the promotion of one fate (e.g. anterior) followed by lateral interactions to promote the other (e.g. posterior).

Although a single positional cue might be sufficient to specify fate distinctions, the integration of the three types of cues, combined with redundancy, may result in a more robust fate specification mechanism. The use of multiple signals is observed in several systems. For instance, *Xenopus* mesoderm induction requires multiple positional cues from vegetal cells (reviewed by Kimelman et al., 1992) and the 'community effect' (Gurdon et al., 1984; Gurdon et al., 1993), a potential excitatory lateral interaction. Similarly, vulval induction in *C. elegans* hermaphrodites likely involves at least two positional cues and a lateral interaction (reviewed by Horvitz and Sternberg, 1991). In some systems one cue may predominate (for example, lateral signalling during anchor cell specification; Seydoux and Greenwald, 1989) and be both necessary and sufficient for a particular fate. However, technical constraints may also limit the characterization of the true complexity of fate specification in many systems. We expect that complex integration of these three types of cell interactions may be common in other tissues and organisms.

We thank Leon Avery, Eric Davidson, Scott Fraser, Andy Golden, Russell Hill, Linda Huang, Gregg Jongeward, Paul Kayne, Howard Lipshitz, and Anna Newman for comments on the manuscript, and Gladys Medina for technical assistance. **CB1490** was provided by the *Caenorhabditis* Genetics Center. This research was supported by the Howard Hughes Medical Institute. H. M. C. was an NSF predoctoral fellow. P. W. S. is an investigator of HHMI.

## REFERENCES

- Avery, L. and Horvitz, H. R. (1987). A cell that dies during wild-type *C. elegans* development can function as a neuron in a *ced-3* mutant. *Cell* **51**, 1071-1078.
- Blair, S. S. and Weisblat, D. A. (1984). Cell interactions in the developing epidermis of the leech *Helobdella triserialis*. *Dev. Biol.* **101**, 318-325.
- Bowerman, B., Tax, F. E., Thomas, J. H. and Priess, J. R. (1992). Cell interactions involved in development of the bilaterally symmetrical intestinal valve cells during embryogenesis in *Caenorhabditis elegans*. *Development* **116**, 1113-1122.
- Brenner, S. (1974). The genetics of *Caenorhabditis elegans*. *Genetics* **77**, 71-94.
- Chisholm, A. D. and Hodgkin, J. (1989). The *mab-9* gene controls the fate of B, the major male-specific blast cell in the tail region of *Caenorhabditis elegans*. *Genes Dev.* **3**, 1413-1423.
- Doe, C. Q. and Goodman, C. S. (1985). II. The role of cell interactions and cell lineage in the determination of neuronal precursor cells. *Dev. Biol.* **111**, 206-219.
- Goldstein, B. (1992). Induction of gut in *Caenorhabditis elegans* embryos. *Nature* **357**, 255-257.
- Greenwald, I. S., Sternberg, P. W. and Horvitz, H. R. (1983). The *lin-12* locus specifies cell fates in *Caenorhabditis elegans*. *Cell* **34**, 435-444.
- Gurdon, J. B., Brennan, S., Fairman, S. and Mohun, T. J. (1984). Transcription of muscle-specific actin genes in early *Xenopus* development: Nuclear transplantation and cell dissociation. *Cell* **38**, 691-700.
- Gurdon, J. B., Tiller, E., Roberts, J. and Kato, K. (1993). A community effect in muscle development. *Curr. Biol.* **3**, 1-11.
- Heitzler, P. and Simpson, P. (1991). The choice of cell fate in the epidermis of *Drosophila*. *Cell*, **64**, 1083-1092.
- Hodgkin, J., Horvitz, H. R. and Brenner, S. (1979). Nondisjunction mutants of the nematode *Caenorhabditis elegans*. *Genetics* **91**, 67-94.
- Horvitz, H. R., Sternberg, P. W., Greenwald, I. S., Fixsen, W. and Ellis, H. M. (1983). Mutations that affect neural cell lineages and cell fates during the development of the nematode *Caenorhabditis elegans*. *Cold Spring Harbor Symp. Quant. Biol.* **48**, 453-463.
- Horvitz, H. R. and Sternberg, P. W. (1991). Multiple intercellular signalling systems control the development of the *C. elegans* vulva. *Nature* **351**, 535-541.
- Kenyon, C. J. (1986). A gene involved in the development of the posterior body region of *Caenorhabditis elegans*. *Cell* **46**, 477-487.
- Kimble, J. and Hirsh, D. (1979). The postembryonic cell lineages of the hermaphrodite and male gonads in *Caenorhabditis elegans*. *Dev. Biol.* **70**, 396-417.
- Kimble, J. (1981). Lineage alterations after ablation of cells in the somatic gonad of *Caenorhabditis elegans*. *Dev. Biol.* **87**, 286-300.
- Kimelman, D., Christian, J. L. and Moon, R. T. (1992). Synergistic principles of development: overlapping patterning systems in *Xenopus* mesoderm induction. *Development* **116**, 1-9.
- Nishida, H. and Satoh, N. (1989). Determination and regulation in the pigment cell lineage of the ascidian embryo. *Dev. Biol.* **132**, 355-367.
- Priess, J. R. and Thomson, J. N. (1987). Cellular interactions in early *Caenorhabditis elegans* embryos. *Cell* **48**, 241-250.
- Schierenberg, E. (1987). Reversal of cellular polarity and early cell-cell interactions in the embryo of *Caenorhabditis elegans*. *Dev. Biol.* **122**, 452-463.
- Seydoux, G. and Greenwald, I. (1989). Cell autonomy of *lin-12* function in a cell fate decision in *C. elegans*. *Cell* **57**, 1237-1245.
- Shankland, M. and Weisblat, D. A. (1984). Stepwise commitment of blast cell fates during the positional specification of the O and P cell lines in the leech embryo. *Dev. Biol.* **106**, 326-342.
- Sternberg, P. W. (1988). Lateral inhibition during vulval induction in *Caenorhabditis elegans*. *Nature* **335**, 551-554.
- Sternberg, P. W. and Horvitz, H. R. (1986). Pattern formation during vulval development in *Caenorhabditis elegans*. *Cell* **44**, 761-772.
- Sternberg, P. W. and Horvitz, H. R. (1988). *lin-17* mutations of *C. elegans* disrupt asymmetric cell divisions. *Dev. Biol.* **130**, 67-73.
- Sulston, J. and Horvitz, H. R. (1977). Postembryonic cell lineages of the nematode *Caenorhabditis elegans*. *Dev. Biol.* **56**, 110-156.
- Sulston, J. E., Albertson, D. G. and Thomson, J. N. (1980). The *Caenorhabditis elegans* male: Postembryonic development of nongonadal structures. *Dev. Biol.* **78**, 542-576.
- Sulston, J. E. and Hodgkin, J. (1988). Methods In *The Nematode*

- Caenorhabditis elegans*. (ed. W. Wood), pp. 587-606. Cold Spring Harbor Laboratory: Cold Spring Harbor, New York.
- Sulston, J. E., Schierenberg, E., White, J. G. and Thomson, J. N.** (1983). The embryonic cell lineage of the nematode *Caenorhabditis elegans*. *Dev. Biol.* **100**, 64-119.
- Sulston, J. E. and White, J. G.** (1980). Regulation and cell autonomy during postembryonic development of *Caenorhabditis elegans*. *Dev. Biol.* **78**, 577-597.
- Wood, W. B.** (1991). Evidence from reversal of handedness in *C. elegans* for early cell interactions determining cell fates. *Nature* **349**, 536-538.

(Accepted 10 March 1993)
